1 **MCU gain- and loss-of-function models define the duality of mitochondrial calcium**  
2 **uptake in heart failure**

3

4 **Authors:**

5 Joanne F. Garbincius, PhD<sup>a</sup>, Timothy S. Luongo, PhD<sup>a</sup>, Jonathan P. Lambert, PhD<sup>a</sup>, Adam S.  
6 Mangold, BS<sup>a</sup>, Emma K. Murray, PhD<sup>a</sup>, Alycia N. Hildebrand, BS<sup>a</sup>, Pooja Jadiya, PhD<sup>a, b</sup>, John  
7 W. Elrod, PhD<sup>a</sup>

8

9 **Affiliations:**

10 <sup>a</sup>Cardiovascular Research Center, Department of Cardiovascular Sciences, Lewis Katz School  
11 of Medicine at Temple University, Philadelphia, PA, USA

12 <sup>b</sup>Department of Internal Medicine, Wake Forest University School of Medicine, Winston-Salem,  
13 NC, USA

14 **Running Title:**

15 Early versus chronic effects of mitochondrial calcium uptake in heart failure.

16

17

18

19 **Address for Correspondence:**

20 John W. Elrod, PhD  
21 Director, Cardiovascular Research Center  
22 Lewis Katz School of Medicine at Temple University  
23 3500 N. Broad Street  
24 Philadelphia, PA 19140  
25 Phone: 215-707-5480  
26 elrod@temple.edu  
27 www.elrodlab.org  
28 @TheElrodLab

29

30

31

32

33

34

35

36

37

38

39

40  
41  
42  
43  
44  
45  
46  
47  
48  
49  
50  
51  
52  
53  
54  
55  
56  
57  
58  
59  
60  
61  
62  
63  
64  
65  
66  
67  
68  
69  
70  
71  
72  
73  
74  
75  
76  
77  
78  
79  
80  
81  
82

## ABSTRACT

**Background:** Mitochondrial calcium ( ${}_m\text{Ca}^{2+}$ ) uptake through the mitochondrial calcium uniporter channel (mtCU) stimulates metabolism to meet acute increases in cardiac energy demand. However, excessive  ${}_m\text{Ca}^{2+}$  uptake during stress, as in ischemia-reperfusion, initiates permeability transition and cell death. Despite these often-reported acute physiological and pathological effects, a major unresolved controversy is whether mtCU-dependent  ${}_m\text{Ca}^{2+}$  uptake and long-term elevation of cardiomyocyte  ${}_m\text{Ca}^{2+}$  contributes to the heart's adaptation during sustained increases in workload.

**Objective:** We tested the hypothesis that mtCU-dependent  ${}_m\text{Ca}^{2+}$  uptake contributes to cardiac adaptation and ventricular remodeling during sustained catecholaminergic stress.

**Methods:** Mice with tamoxifen-inducible, cardiomyocyte-specific gain ( $\alpha\text{MHC-MCM} \times \text{flox-stop-MCU}$ ; MCU-Tg) or loss ( $\alpha\text{MHC-MCM} \times \text{Mcu}^{\text{fl/fl}}$ ; *Mcu*-cKO) of mtCU function received 2-wk catecholamine infusion.

**Results:** Cardiac contractility increased after 2d of isoproterenol in control, but not *Mcu*-cKO mice. Contractility declined and cardiac hypertrophy increased after 1-2-wk of isoproterenol in MCU-Tg mice. MCU-Tg cardiomyocytes displayed increased sensitivity to  $\text{Ca}^{2+}$ - and isoproterenol-induced necrosis. However, loss of the mitochondrial permeability transition pore (mPTP) regulator cyclophilin D failed to attenuate contractile dysfunction and hypertrophic remodeling, and increased isoproterenol-induced cardiomyocyte death in MCU-Tg mice.

**Conclusions:** mtCU  ${}_m\text{Ca}^{2+}$  uptake is required for early contractile responses to adrenergic signaling, even those occurring over several days. Under sustained adrenergic load excessive MCU-dependent  ${}_m\text{Ca}^{2+}$  uptake drives cardiomyocyte dropout, perhaps independent of classical mitochondrial permeability transition pore opening, and compromises contractile function. These findings suggest divergent consequences for acute versus sustained  ${}_m\text{Ca}^{2+}$  loading, and support distinct functional roles for the mPTP in settings of acute  ${}_m\text{Ca}^{2+}$  overload versus persistent  ${}_m\text{Ca}^{2+}$  stress.

**Key words:** mitochondria, cell death, MCU, contractility, overexpression, knockout

### Abbreviations:

$\text{Ca}^{2+}$ : calcium  
CypD: cyclophilin D  
 ${}_i\text{Ca}^{2+}$ : intracellular calcium  
 ${}_m\text{Ca}^{2+}$ : mitochondrial calcium  
mtCU: mitochondrial calcium uniporter channel  
MCU: mitochondrial calcium uniporter  
mPT: mitochondrial permeability transition  
mPTP: mitochondrial permeability transition pore

83

## INTRODUCTION

84           Rapid uptake of calcium ( $\text{Ca}^{2+}$ ) into the mitochondrial matrix occurs via the mitochondrial  
85 calcium uniporter channel (mtCU), a multi-protein complex that spans the inner mitochondrial  
86 membrane<sup>1,2</sup> and consists of a pore-forming subunit, MCU<sup>3,4</sup>, and the accessory regulatory  
87 proteins EMRE<sup>5-7</sup>; MCUB<sup>8</sup>, MICU1 and MICU2/3<sup>9-15</sup>, and MCUR1<sup>16,17</sup>. Cardiomyocyte  
88 mitochondrial  $\text{Ca}^{2+}$  ( $\text{mCa}^{2+}$ ) uptake through the mtCU increases when the local cytosolic  $\text{Ca}^{2+}$   
89 concentration rises past  $\sim 400\text{nM}$ <sup>1</sup>. The mtCU is thus responsible for rapidly increasing net  $\text{mCa}^{2+}$   
90 content in response to acute elevations in cytosolic  $\text{Ca}^{2+}$  concentration, such as occurs when  
91 the heart is subjected to acute sympathetic stimulation and cellular  $\text{Ca}^{2+}$  cycling is enhanced.  
92 This acute increase in  $\text{mCa}^{2+}$  content is thought to act as a second messenger that stimulates  
93 TCA cycle dehydrogenases and a subsequent increase in the rate of mitochondrial ATP  
94 production. This process guarantees that ATP generation is increased in parallel with the  
95 stimulation of ATP-consuming cytosolic processes such as myofilament crossbridge cycling that  
96 drive the contraction of the heart<sup>2</sup>.

97           Recent investigations indicate that physiological  $\text{mCa}^{2+}$  uptake through the mtCU is  
98 required to support an increased heart rate and increased cardiac contractility in the minutes  
99 immediately following acute  $\beta$ -adrenergic stimulation<sup>18-20</sup>. However,  $\text{mCa}^{2+}$  uptake through the  
100 mtCU also contributes to  $\text{mCa}^{2+}$  overload and mitochondrial permeability transition (mPT) in  
101 response to extreme cytosolic  $\text{Ca}^{2+}$  levels<sup>21</sup>. The observation that conditional deletion of *Mcu* in  
102 adult mouse cardiomyocytes is sufficient to prevent  $\text{mCa}^{2+}$  overload and subsequent necrotic cell  
103 death during cardiac ischemia-reperfusion injury<sup>19,20</sup> supports this model. Yet, despite such  
104 evidence for the contribution of mtCU-dependent  $\text{mCa}^{2+}$  uptake to the heart's response to acute  
105 physiological or pathological  $\text{Ca}^{2+}$  stress, the relevance of the mtCU and sustained elevations in  
106  $\text{mCa}^{2+}$  concentration to the heart's responses to chronic increases in cardiac workload remains  
107 controversial.

108 Cardiac MCU expression is increased in patients with pressure overload due to aortic  
109 stenosis and in mouse models of cardiac hypertrophy<sup>22, 23</sup>. The expression of additional  
110 components of the  $mCa^{2+}$  exchange machinery, including the mtCU regulator MICU1 and the  
111 mitochondrial sodium-calcium exchanger NCLX, are also altered in the failing human heart<sup>24, 25</sup>,  
112 suggestive of altered  $mCa^{2+}$  handling in chronic heart disease. Such findings have prompted  
113 investigation into whether mtCU-dependent  $mCa^{2+}$  uptake may be an adaptive or maladaptive  
114 aspect of the heart's response to chronic stress. Early experiments in mice showed no positive  
115 nor detrimental effect of constitutive, global *Mcu* deletion or adult, cardiomyocyte-specific *Mcu*  
116 deletion on functional decompensation or pathological cardiac remodeling following chronic  
117 pressure overload (transverse aortic constriction; TAC)<sup>20, 26</sup>. More recent conflicting studies  
118 indicate that pharmacologic blockade of MCU protects against declines in cardiac function after  
119 TAC<sup>23</sup>; or instead that increasing  $mCa^{2+}$  uptake in pressure- + neurohormonal overload-induced  
120 heart failure via viral MCU overexpression can be beneficial by reducing oxidative stress and  
121 ultimately improving contractile function<sup>27</sup>. Direct comparison of these disparate results, and  
122 understanding of the ultimate functional consequences of sustained uniporter-dependent  $mCa^{2+}$   
123 uptake in chronic heart disease, is confounded by differences in experimental approaches used  
124 to manipulate mtCU function (pharmacologic vs. genetic; global vs. cell-type specific); the time  
125 available for compensatory adaptations to occur in models with constitutive vs. inducible gene  
126 disruption; distinct timepoints of experimental interventions throughout the course of cardiac  
127 decompensation (prior to onset of precipitating insult vs. after the appearance of contractile  
128 dysfunction); model system (species; assessment of cardiomyocyte vs. whole-heart function);  
129 and inclusion of single vs. multiple analysis timepoints among these studies<sup>28</sup>. Therefore, we  
130 performed longitudinal studies comparing the impact of inducible, adult cardiomyocyte-specific  
131 loss- or gain- of uniporter function to clarify the role that the mtCU and altered  $mCa^{2+}$  content  
132 play in the heart's adaptation and eventual maladaptation to chronic catecholamine stimulation  
133 and elevated cardiac workload.

134 Here, we demonstrate that the mtCU is required to increase cardiac contractility over the  
135 first several days of isoproterenol stimulation and conclude that any mtCU-independent  $mCa^{2+}$   
136 uptake that may occur over this time frame is insufficient to support *in vivo* increases in cardiac  
137 workrate. We find that increased  $mCa^{2+}$  uptake through the mtCU becomes detrimental only  
138 after 1-2 wks of sustained catecholaminergic stimulation, suggesting that persistent  $mCa^{2+}$   
139 loading results in a gradual shift from the  $mCa^{2+}$  signal mediating beneficial early metabolic  
140 adaptation to an increased cardiac workload, to the  $mCa^{2+}$  signal later driving maladaptive  
141 responses. We further show that genetic disruption of mitochondrial permeability transition is  
142 insufficient to prevent the functional decline or pathological remodeling of MCU-overexpressing  
143 hearts subjected to chronic adrenergic stress, and increases isoproterenol-induced  
144 cardiomyocyte death. Our findings suggest that although  $mCa^{2+}$  uptake through the mtCU is  
145 required to support initial increases in contractility at the onset of adrenergic stimulation, under  
146 prolonged  $Ca^{2+}$  stress,  $mCa^{2+}$  uptake drives cardiomyocyte dropout, possibly independent of  
147 classical cyclophilin D-regulated cell death, and compromises cardiac function.

148

149

## METHODS

### Mice.

151 To generate a conditional MCU overexpression mouse model, the coding sequence and  
152 stop codon of human *MCU* cDNA (NCBI reference sequence NM\_138357.1) was cloned into a  
153 custom CAG-loxP-CAT-loxP plasmid following a strategy we described previously<sup>29</sup>. The  
154 resulting construct contained the artificial CAG promoter followed by loxP sites flanking  
155 chloramphenicol acetyltransferase (CAT) with multiple stop sequences, with the *MCU* cDNA  
156 following the second loxP site. Cre-mediated recombination of the loxP sites excises the CAT-  
157 stop sequence, allowing for the strong ubiquitous CAG promoter to drive expression of the MCU

158 transgene. The plasmid was linearized and injected into 1-cell embryos, which were  
159 transplanted into pseudo-pregnant female mice. Resulting flox-stop-MCU founders were  
160 crossed to  $\alpha$ MHC-Cre mice (Jackson Laboratories strain #009074)<sup>30</sup> to enable constitutive  
161 expression in cardiomyocytes. Founder lines were evaluated for expression and leakiness of the  
162 MCU transgene via Western blot. A flox-stop-MCU founder line exhibiting strong, Cre-  
163 dependent MCU transgene expression in the heart, and no expression in the absence of Cre,  
164 was selected for further use (**Supplemental Fig. S1A**). For tamoxifen inducible, cardiomyocyte-  
165 specific transgene expression, flox-stop-MCU mice were crossed to  $\alpha$ -myosin heavy chain-  
166 MerCreMer mice ( $\alpha$ MHC-MCM; “MCM”; Jackson Laboratories strain #005657) to generate  
167  $\alpha$ MHC-MCM x flox-stop-MCU (“MCU-Tg”) animals. *Mcu*<sup>f/f</sup> mice were crossed to  $\alpha$ MHC-MCM  
168 mice to generate  $\alpha$ MHC-MCM x *Mcu*<sup>f/f</sup> (*Mcu*-cKO) animals and allow tamoxifen-inducible,  
169 cardiomyocyte-specific *Mcu* deletion as described and validated previously<sup>19</sup>. The generation of  
170 mice with global deletion of cyclophilin D (*Ppif*<sup>-/-</sup>) has been described elsewhere<sup>31</sup>. *Ppif*<sup>-/-</sup> mice  
171 were crossed to MCM mice and to MCU-Tg mice. *Ppif*<sup>-/-</sup> offspring were interbred to generate  
172 MCM and MCU-Tg mice on both wild-type and *Ppif*<sup>-/-</sup> backgrounds. All mouse lines were  
173 maintained on a C57BL/6N background (Jackson Laboratories strain #005304).

174 Mice were genotyped for presence of the MCU transgene using one of two primer sets.  
175 The first primer set, with expected product size of 599 base pairs, consisted of the forward  
176 primer: 5'- CAGTTCACACTCAAGCCTATCT-3' and the reverse primer: 5'-  
177 CTGTCTCTGGCTTCTGGATAAA-3'. The second primer set, with expected product size of 354  
178 base pairs, consisted of the forward primer: 5'- CTGTTGTGCCCTCTGATGAT-3' and the  
179 reverse primer: 5'- GTTGCTGGACCAATGTCTTTAC-3'. PCR reaction mixture contained 1uL  
180 tail DNA in DirectPCR Lysis reagent (Viagen Biotech #102-T), 1x Taq buffer (Syd Labs  
181 #MB042-EUT), 80 $\mu$ M each dNTPs (New England Biolabs #N0447L), 800nM each forward and  
182 reverse primers, and 1.25 U Taq polymerase (Syd Labs #MB042-EUT). The PCR conditions

183 were denaturation at 95°C for 3 minutes, followed by 40 cycles (95°C for 30 seconds, 61°C for  
184 30 seconds, 72°C for 30 seconds), followed by 5 minutes at 72°C.

185 Mice were genotyped for the presence of the  $\alpha$ MHC-Cre or the  $\alpha$ MHC-MCM transgene  
186 using the forward primer: 5'-GGCGTTTTCTGAGCATACCT-3' and the reverse primer: 5'-  
187 CTACACCAGAGACGGAAATCCA-3', with an expected product size of 565-585 base pairs.  
188 PCR reaction mixture contained 1uL tail DNA in DirectPCR Lysis reagent, 1x Taq buffer, 80μM  
189 each dNTPs, 800nM each forward and reverse primers, and 1.25 U Taq polymerase. The PCR  
190 conditions were, denaturation at 95°C for 3 minutes, followed by 34 cycles (95°C for 30  
191 seconds, 55°C for 30 seconds, 72°C for 30 seconds), followed by 10 minutes at 72°C.

192 Mice were genotyped for *Mcu* using the forward primer: 5'-  
193 GAAGGCCTCCTGTTATGGAT-3' and the reverse primer: 5'-CCAGCTTGGTGAAGCCTGAT-3',  
194 with expected product sizes of 261 base pairs for the wild-type allele and 354 base pairs for the  
195 floxed allele. PCR reaction mixture contained 1uL tail DNA in DirectPCR Lysis reagent, 1x Taq  
196 buffer, 100μM each dNTPs, 100mM betaine (Sigma-Aldrich #B0300), 1μM each forward and  
197 reverse primers, and 1.25 U Taq polymerase. The PCR conditions were: denaturation at 95°C  
198 for 3 minutes, followed by 34 cycles (95°C for 30 seconds, 55°C for 30 seconds, 72°C for 30  
199 seconds), followed by 10 minutes at 72°C.

200 Mice were genotyped for *Ppif* using the forward primers: 5'-  
201 CTCTTCTGGGCAAGAATTGC-3' (wild-type allele) or 5'-GGCTGCTAAAGCGCATGCTCC-3'  
202 (null allele); and the reverse primer: 5'-ATTGTGGTTGGTGAAGTCGCC-3', with expected  
203 product sizes of 850 base pairs for the wild-type allele and 600 base pairs for the null allele.  
204 PCR reaction mixture contained 1uL tail DNA in DirectPCR Lysis reagent, 1x Taq buffer, 200μM  
205 each dNTPs, 1μM each forward and reverse primers, and 2.5 U Taq polymerase. The PCR  
206 conditions were: denaturation at 95°C for 3 minutes, followed by 34 cycles (95°C for 30  
207 seconds, 56°C for 1 minute, 72°C for 1.5 minutes), followed by 5 minutes at 72°C.

208 All mice were used between 8-25 weeks of age. Both male and female mice were  
209 included. Experiments were performed and analyzed using a numbered ear-tagging system to  
210 blind the experimenter to mouse genotype and experimental group. All animal experiments  
211 followed AAALAC guidelines and were approved by Temple University's IACUC.

212

### 213 **Tamoxifen-inducible MCU overexpression or *Mcu* deletion.**

214 For initial characterization of temporal overexpression of MCU, MCU-Tg mice received  
215 intraperitoneal injections with 20mg/kg/day of tamoxifen (Sigma-Aldrich #T5648) dissolved in  
216 corn oil (Sigma-Aldrich # C8267) for 5 consecutive days. Control  $\alpha$ MHC-MCM mice were  
217 subjected to this same tamoxifen injection paradigm. Mice were allowed 2-3 days of tamoxifen  
218 washout prior to acute *in vitro* studies. To compare loss- and gain- of MCU function *in vivo*,  
219  $\alpha$ MHC-MCM, *Mcu*-cKO, and MCU-Tg mice all received intraperitoneal injections with  
220 40mg/kg/day of tamoxifen dissolved in corn oil for 5 consecutive days to ensure effective  
221 deletion of *Mcu*<sup>19</sup>. For *in vivo* experiments, mice were allowed 16 days of tamoxifen washout  
222 following the last tamoxifen dose, prior to baseline echocardiography and osmotic minipump  
223 implantation.

224

### 225 **Isolation of adult mouse cardiomyocytes.**

226 Cardiomyocytes were isolated from the ventricles of adult mouse hearts based on  
227 methods previously reported<sup>19, 32</sup>. In brief, mice were injected with 1000U heparin (McKesson  
228 Corporation, #691115) and the hearts rapidly excised. The aorta was cannulated and the heart  
229 perfused with perfusion buffer (120.4mM NaCl (Sigma-Aldrich #S9888), 14.7mM KCl (Amresco  
230 #0395), 0.6mM KH<sub>2</sub>PO<sub>4</sub> (Amresco #0781), 0.6mM NaH<sub>2</sub>PO<sub>4</sub> (Amresco #0404), 1.2mM  
231 MgSO<sub>4</sub>·7H<sub>2</sub>O (Sigma-Aldrich # 230391), 10mM HEPES (Research Products International



232 #H75030), 4.6mM NaHCO<sub>3</sub> (Sigma-Aldrich #S5761 check), 5.5mM glucose (Sigma-Aldrich  
233 #G8270), 10mM 2,3-butanedione monoxime (Sigma-Aldrich #B0753), and 30mM taurine  
234 (Sigma-Aldrich #T8691), pH = 7.4), then digested with perfusion buffer supplemented with  
235 1mg/mL collagenase B (Sigma-Aldrich #11088831001), 139µg/mL trypsin (ThermoFisher  
236 #15090046) and 12.5µM CaCl<sub>2</sub> (Sigma-Aldrich # 21115). Digested heart tissue was teased into  
237 small pieces using fine forceps and further dissociated by gentle pipetting to release  
238 cardiomyocytes. Trypsin digestion was terminated by transferring cells to stopping buffer  
239 (perfusion buffer supplemented with 10% fetal bovine serum (Peak Serum #PS-FB3) and  
240 12.5µM CaCl<sub>2</sub>). All cardiomyocytes were used within 3 hours of isolation.

241

#### 242 **Mitochondrial isolation.**

243 Mitochondria were isolated from hearts of adult mice 1wk after the start of tamoxifen  
244 injections based on the approach of Frezza et al.<sup>33</sup>. Excised hearts were minced in ice-cold 1x  
245 phosphate buffered saline (PBS) (Morganville Scientific # PH0200) supplemented with 10mM  
246 EDTA (BioWORLD #40520000-1), washed 3 times, and digested on ice in 1x PBS  
247 supplemented with 10mM EDTA and 83.3 µg/mL trypsin. Digested tissue was rinsed 3 times in  
248 1x PBS supplemented with 10mM EDTA then centrifuged at 200g for 5min at 4°C to pellet the  
249 tissue. Tissue chunks were resuspended in ice-cold IBM1 buffer (67mM sucrose (BioWORLD #  
250 41900152-2), 5mM Tris/HCl (BioPioneer #C0116), 5mM KCl, 1mM EDTA, 0.2% bovine serum  
251 albumin (Sigma-Aldrich # A3803), pH = 7.2) and homogenized using a glass/Teflon  
252 homogenizer with an overhead stirrer (Heidolph Instruments #501-64010-00) at 2000rpm. The  
253 homogenate was centrifuged at 700g for 10min at 4°C, and the supernatant centrifuged again at  
254 7200g for 12min at 4°C to pellet mitochondria. Mitochondria were washed in ice-cold IBM2  
255 buffer (250mM sucrose, 0.3mM EGTA/Tris (Sigma-Aldrich #E3889; Amresco #0497); 1mM  
256 Tris/HCl, pH = 7.2) and centrifuged at 7200g for 12min at 4°C. The supernatant was removed

257 and isolated mitochondria were used for size exclusion chromatography or for mitochondrial  
258 swelling assays as described below.

259

### 260 **Fast protein size-exclusion liquid chromatography (FPLC).**

261 For each replicate experiment, cardiac mitochondria isolated from 3-5 pooled hearts of  
262 each genotype were lysed on ice for 30 min in 1X RIPA buffer (EMD Millipore #20-188)  
263 supplemented with 1X protease inhibitors (Sigma-Aldrich #S8830-20TAB), and lysates were  
264 cleared by centrifuging at 14000g for 10min at 4°C. Protein concentration was determined by  
265 bicinchoninic acid assay (BioWORLD #20831001). 2500µg of cleared mitochondrial lysate were  
266 fractionated by gel filtration using fast protein size-exclusion liquid chromatography (AKTA Pure  
267 FPLC; GE Healthcare), using a Superdex 200 Increase 10/300 column (Sigma-Aldrich, #GE28-  
268 9909-44) equilibrated in 1X PBS, at a flow rate of 0.5mL/min. 0.5mL protein fractions were  
269 collected, concentrated to 75µL with 3kD molecular weight cutoff AMICON Ultra-0.5 centrifugal  
270 filter devices (EMD Millipore #UFC500396) following the manufacturer's instructions.  
271 Concentrated protein fractions were used for western blotting under reducing conditions as  
272 described below. Molecular weights of FPLC fractions were calibrated using gel filtration  
273 markers (Sigma-Aldrich #MWGF1000).

274

### 275 **Western blotting.**

276 Isolated adult mouse cardiomyocytes were pelleted by centrifugation at 200g for 5min,  
277 then washed in 1X PBS, and centrifuged again at 200g for 5min. The supernatant was removed,  
278 and cardiomyocyte pellets were snap frozen in liquid nitrogen until use. Cardiomyocyte pellets  
279 were lysed in ice-cold 1X RIPA buffer supplemented with 1X protease inhibitors and 1X  
280 Phosstop phosphatase inhibitor (Roche #04906837001) and sonicated for 10sec. Lysates were

281 centrifuged for 5min at 5000g at 4°C, and the supernatant was used for western blotting. Mouse  
282 heart tissue was homogenized in ice-cold 1X RIPA buffer supplemented with 1X protease  
283 inhibitors and 1X Phosstop phosphatase inhibitor using a bead mill homogenizer (VWR,  
284 #75840–022). Homogenates were sonicated for 10sec, then centrifuged for 5min at 5000g at  
285 4°C, and the supernatant was used for western blotting. Protein concentration in cardiomyocyte  
286 or heart lysates was determined by bicinchoninic acid assay. 5X SDS sample buffer (250 µM  
287 Tris/HCl, pH 7.0; 40% (v/v) glycerol (Sigma-Aldrich #G5516); 8% (w/v) sodium dodecyl sulfate  
288 (Amresco #0227); 20% (v/v) β-mercaptoethanol (Sigma-Aldrich # M6250); 0.1% (w/v)  
289 bromophenol blue (Fisher Scientific #BP115-25) was added to samples to a final concentration  
290 of 1X, and 20-50µg of protein/well was separated on 10% (w/v) polyacrylamide Tris-glycine SDS  
291 gels. For samples from isoproterenol infusion cohorts, 25µg protein/well was separated on  
292 NuPAGE 4-12% Bis-Tris midi protein gels (ThermoFisher #WG1403BOX). 20µl of concentrated  
293 protein fractions from FPLC experiments were mixed with 5X SDS sample to a final  
294 concentration of 1X, and equal volumes of each fraction were separated on NuPAGE 4-12%  
295 Bis-Tris midi protein gels.

296       After separation by electrophoresis, proteins were transferred to polyvinylidene fluoride  
297 membranes (Millipore #IPFL00010). Membranes were blocked in blocking buffer (Rockland  
298 #MB-070) for 1 hour at room temperature, and then incubated overnight at 4°C in primary  
299 antibodies diluted in 50% blocking buffer / 50% Tris buffered saline (bioWORLD #42020056–3)  
300 + 0.1% TWEEN (Sigma-Aldrich #P9416) (TBS-T). Primary antibodies and dilutions included:  
301 rabbit monoclonal against MCU (Cell Signaling Technologies #14997) 1:1000; rabbit polyclonal  
302 against MCU (Sigma #HPA016480) 1:1000; mouse monoclonal against total OXPHOS  
303 complexes (Abcam #ab110413) 1:1000; rabbit polyclonal against phospho-PDH E<sub>1</sub>a-Ser<sup>293</sup>  
304 (Abcam #ab92696) 1:1000; mouse monoclonal against PDH E<sub>1</sub>a subunit (Abcam #ab110330)  
305 1:1000; mouse monoclonal against ATP5A (Abcam #ab14748), 1:2000; rabbit polyclonal

306 against MICU1 (Sigma #HPA037480), 1:1000; rabbit polyclonal against EMRE (Bethyl  
307 Laboratories # A300-BL19208) 1:1000; mouse monoclonal against cyclophilin D (Abcam  
308 #ab110324) 1:1,000; and mouse monoclonal against total PDH subunits (Abcam #ab110416)  
309 1:500. Membranes were washed 3 times in TBS-T and incubated for 1.5 hours at room  
310 temperature in secondary antibodies diluted 1:10,000 in 50% blocking buffer / 50% TBS-T.  
311 Secondary antibodies and dilutions included: IRDye 800CW goat anti-rabbit (LI-COR #925-  
312 32211) 1:10,000; IRDye 800CW Goat anti-Mouse (LI-COR, #926-32210) 1:10,000; IRDye  
313 680RD goat anti-rabbit (LI-COR #926-68071) 1:10,000; and IRDye 680RD goat anti-mouse (LI-  
314 COR #925-68070) 1:10,000. Membranes were then washed 3 times in TBS-T and imaged using  
315 a LI-COR Odyssey infrared imaging system. All full-length western blots are shown in  
316 Supplemental Figs. S1-S5. Densitometric quantification of western blots was performed with LI-  
317 COR Image Studio software (LI-COR, version 2.0.38).

318

### 319 **$mCa^{2+}$ handling assays.**

320 Adult mouse cardiomyocytes were isolated as described above and counted in stopping  
321 buffer before assessment of  $mCa^{2+}$  uptake and mitochondrial calcium retention capacity based  
322 on methods described previously<sup>14, 19</sup>. For each assay replicate, 300,000 live cardiomyocytes  
323 were pelleted at 100g for 3 min, resuspended in extracellular-like  $Ca^{2+}$ -free buffer (120mM NaCl;  
324 5mM KCl; 1mM  $KH_2PO_4$ ; 0.2mM  $MgCl_2 \cdot 6H_2O$  (Fisher Scientific #M35-500); 0.1mM EGTA;  
325 20mM HEPES; pH 7.4), and incubated on ice for 5min to chelate extracellular  $Ca^{2+}$ .  
326 Cardiomyocytes were pelleted by centrifugation at 100g for 3 min, the extracellular-like  $Ca^{2+}$ -  
327 free buffer was removed, and the cells were resuspended in permeabilization buffer consisting  
328 of intracellular-like medium (120mM KCl; 10mM NaCl; 1mM  $KH_2PO_4$ ; 20mM HEPES; pH 7.2)  
329 that had been cleared with Chelex 100 (Bio-Rad # 1422822) to remove trace  $Ca^{2+}$ , and  
330 supplemented with 1X EDTA-free protease inhibitor cocktail (Sigma-Aldrich #4693132001), 120

331  $\mu\text{g/mL}$  digitonin (Sigma-Aldrich # D141),  $3\mu\text{M}$  thapsigargin (Enzo Life Sciences # BML-PE180-  
332 0005), and  $5\text{mM}$  succinate (Sigma-Aldrich # S3674).  $1\mu\text{M}$  Fura-FF (AAT Bioquest #21028) was  
333 used to monitor extra-mitochondrial  $\text{Ca}^{2+}$  and  $4.8\mu\text{M}$  JC-1 (Enzo Life Sciences #52304) was  
334 added at the indicated time to monitor mitochondrial membrane potential ( $\Delta\Psi_m$ ). Permeabilized  
335 cardiomyocytes were gently stirred at  $37^\circ\text{C}$  in a Delta Ram spectrofluorometer (Photon  
336 Technology International) set to record fluorescence at  $340\text{nm}_{\text{ex}}$ ,  $535\text{nm}_{\text{em}}$  and  $380\text{nm}_{\text{ex}}$ ,  
337  $535\text{nm}_{\text{em}}$  for Fura-FF and at  $570\text{nm}_{\text{ex}}$ ,  $595\text{nm}_{\text{em}}$  for the JC-1 aggregate and  $490\text{nm}_{\text{ex}}$ ,  $535\text{nm}_{\text{em}}$   
338 for the JC-1 monomer. The ratio of Fura-FF fluorescence at  $340\text{nm}_{\text{ex}}$ ,  $535\text{nm}_{\text{em}}$  /  $380\text{nm}_{\text{ex}}$ ,  
339  $535\text{nm}_{\text{em}}$  was plotted to assess extra-mitochondrial  $\text{Ca}^{2+}$  and the JC-1  $570\text{nm}_{\text{ex}}$ ,  $595\text{nm}_{\text{em}}$  /  
340  $490\text{nm}_{\text{em}}$ ,  $535\text{nm}_{\text{ex}}$  ratio was plotted to assess  $\Delta\Psi_m$ .

341 For measurement of  ${}_m\text{Ca}^{2+}$  uptake rate, experiments were performed in the presence of  
342  $10\mu\text{M}$  CGP-37157 (Enzo Life Sciences #BML-CM119-0005) to inhibit  ${}_m\text{Ca}^{2+}$  efflux via NCLX.  
343 JC-1 was added to the permeabilized cells after 20sec of baseline recording, and energization  
344 of mitochondria was verified by an increase in the ratio of JC-1 aggregate/monomer  
345 fluorescence. A bolus of  $5\mu\text{M}$   $\text{CaCl}_2$  was injected at 350sec, followed by injection of a  $10\mu\text{M}$   
346 bolus of  $\text{CaCl}_2$  at 650sec. The experiment was terminated by addition of  $10\mu\text{M}$  FCCP (Sigma-  
347 Aldrich #C2920) to collapse  $\Delta\Psi_m$  and release matrix  $\text{Ca}^{2+}$ . 2-3 replicate assay recordings were  
348 performed to determine the average  $\text{Ca}^{2+}$  uptake rate for the 30sec following the peak of the  
349  $10\mu\text{M}$   $\text{Ca}^{2+}$  bolus for each mouse.

350 For measurement of mitochondrial calcium retention capacity, JC-1 was added to  
351 permeabilized cells after 20sec of baseline recording. Beginning at 400sec,  $10\mu\text{M}$  boluses of  
352  $\text{CaCl}_2$  were injected every 60sec until spontaneous collapse of  $\Delta\Psi_m$  and release of matrix  $\text{Ca}^{2+}$   
353 to the bath solution, indicative of mitochondrial permeability transition. The experiment was  
354 terminated by addition of  $10\mu\text{M}$  FCCP to confirm collapse of  $\Delta\Psi_m$ . 1-3 replicate assay

355 recordings were performed to determine the average number of  $\text{Ca}^{2+}$  boluses tolerated prior to  
356  $\Delta\Psi_m$  collapse for each mouse.

357

### 358 **Mitochondrial swelling assay.**

359 Pelleted mitochondria isolated from the hearts of adult mice as described above were  
360 resuspended in fresh IBM2 and centrifuged at 7200g for 12min at 4°C. The supernatant was  
361 removed and mitochondrial pellets were resuspended in isolated mitochondria assay buffer  
362 (125mM KCl; 20mM HEPES; 2mM  $\text{MgCl}_2$ ; 2mM  $\text{KH}_2\text{PO}_4$ ; pH = 7.2). Protein concentration was  
363 determined by bicinchoninic acid assay. 300 $\mu\text{g}$  of mitochondria/well were added to a 96 well  
364 plate in 200 $\mu\text{L}$  assay buffer supplemented with 10mM succinate. Absorbance at 540 $\pm$ 20nm was  
365 measured using a Tecan Infinite M1000 Pro plate reader set at 37°C. A 500 $\mu\text{M}$   $\text{CaCl}_2$  bolus was  
366 injected after 2min of baseline recording and mitochondrial swelling was assessed as a  
367 decrease in absorbance.

368

### 369 **Extracellular flux assays.**

370 Cardiomyocytes were isolated from the hearts of adult mice as described above, and the  
371  $\text{CaCl}_2$  concentration in the stopping buffer was gradually increased to 1mM. Cardiomyocytes  
372 were then pelleted by centrifugation at 100g for 3min, and resuspended in DMEM (Corning #90-  
373 113-PB) supplemented with 5mM glucose, 4mM L-glutamine (Corning #1-030-RM), 0.1mM  
374 sodium pyruvate (Sigma-Aldrich #P8574), 0.2mM BSA-conjugated palmitate (Sigma-Aldrich  
375 #A7030; Sigma-Aldrich #P9767), 0.2mM carnitine (Sigma-Aldrich #C0283), pH = 7.4<sup>34</sup>. 1250 live  
376 cardiomyocytes/well were plated to a 96-well plate (Agilent #101085-004) coated with 50 $\mu\text{g}/\text{mL}$   
377 laminin (ThermoFisher #23017-015) and allowed to attach for 1 hour in a  $\text{CO}_2$ -free 37°C  
378 incubator. A Seahorse XF96 extracellular flux analyzer (Agilent) was used to measure oxygen

379 consumption rate (OCR) at baseline and after sequential additions of 3 $\mu$ M oligomycin (Sigma-  
380 Aldrich #O4876); 1.5 $\mu$ M FCCP; and 2 $\mu$ M rotenone (Sigma-Aldrich #R8875) + 2 $\mu$ M antimycin A  
381 (Sigma-Aldrich # A8674). Basal, ATP-linked, non-mitochondrial, and maximal respiration; proton  
382 leak; and respiratory reserve capacity were calculated as described previously<sup>34</sup>.

383

#### 384 **Echocardiography.**

385 Left ventricular echocardiography was performed as reported elsewhere<sup>19</sup> at baseline  
386 prior to isoproterenol infusion and at indicated timepoints. In brief, mice were anesthetized with  
387 1.5% isoflurane in 100% oxygen and M-mode images were recorded in the short-axis view  
388 using a Vevo 2100 imaging platform (VisualSonics). Recordings were analyzed with  
389 VisualSonics Vevo LAB software (VisualSonics version 3.1.1).

390

#### 391 **Isoproterenol infusion.**

392 Osmotic minipump implantation surgeries were performed as detailed previously<sup>35</sup>. Mice  
393 were anesthetized with 3% isoflurane and an osmotic minipump (Alzet model 2004, #0000298)  
394 set to deliver ( $\pm$ )-isoproterenol hydrochloride (Sigma-Aldrich #I5627) dissolved in sterile saline at  
395 a dose of 70mg/kg/day for 2 weeks was inserted subcutaneously via a small midline incision in  
396 the back. The incision was closed with 5-0 absorbable suture, and mice were administered  
397 40mg/kg of the antibiotic cefazolin (Sandoz #007813450). Mice in the sham group were  
398 subjected to the same protocol, but no minipump was inserted.

399

#### 400 **Tissue gravimetrics and histology.**

401 Hearts were collected 2 weeks after osmotic minipump implantation or sham surgery  
402 and massed. Tibia length was measured for normalization of heart mass. The ventricles were  
403 rinsed in ice-cold 1X PBS, then divided for further analysis. Ventricle base samples were snap  
404 frozen with liquid nitrogen-cooled tongs and stored at -80°C for use in western blotting. Mid-  
405 ventricle cross sections were fixed in 10% buffered formalin (EKI #4498), dehydrated,  
406 embedded in paraffin, and cut to 7µm sections and mounted on glass slides. Heart sections  
407 were labelled with TRITC-conjugated wheat germ agglutinin (Sigma-Aldrich #L5266) at  
408 100µg/mL to outline each cell, and coverslips were mounted using ProLong Gold Antifade  
409 Mountant with DAPI (Invitrogen #P36935). Slides were imaged and cardiomyocyte cross-  
410 sectional area measured as described previously<sup>35</sup>. Lung wet mass was measured at the time of  
411 collection, and lung dry mass was measured after drying the tissue at 37°C for 48 hours for  
412 assessment of lung edema.

413

#### 414 ***In vitro* assessment of reactive oxygen species generation.**

415 Isolated adult mouse cardiomyocytes were prepared and plated as described for  
416 extracellular flux assays above at 5000 live cells/well to clear-bottomed, black-walled 96-well  
417 plates (Greiner Bio-One #655090) coated with 50µg/mL laminin. Cells were allowed to attach for  
418 1 hour. The plates were then changed to fresh media supplemented with 10µM ionomycin  
419 (Cayman Chemical #11932) or 2µM antimycin A or vehicle control and incubated at 37°C for  
420 1hr. Dihydroethidium (DHE) (ThermoFisher #D11347) was added to a final concentration of  
421 5µM for the final 30 minutes of this incubation period. After 1hr total treatment time, the  
422 fluorescence of oxidized DHE was measured at 500nm<sub>ex</sub>, 580nm<sub>em</sub> using a Tecan Infinite  
423 M1000 Pro plate reader.

424



425 ***In vitro* cell death assays.**

426 Isolated adult mouse cardiomyocytes were plated at 1250 live cells/well to laminin-  
427 coated, clear-bottomed, black-walled 96-well plates as for the assessment of reactive oxygen  
428 species generation described above. After 1hr, the plates were changed to fresh media  
429 supplemented with 30 $\mu$ M propidium iodide (ThermoFisher #P1304MP) and with 10-50 $\mu$ M  
430 ionomycin or 2mg/L ( $\pm$ )-isoproterenol hydrochloride or vehicle control and incubated at 37°C for  
431 1hr. Propidium iodide fluorescence was then measured at 530nm<sub>ex</sub>, 645nm<sub>em</sub> on a Tecan Infinite  
432 M1000 Pro plate reader.

433

434 **Evans blue dye labeling.**

435 After 2 weeks of isoproterenol infusion, mice were injected I.P. with a sterile 1% (w/v)  
436 solution of Evans blue dye (EBD) (Sigma-Aldrich #E2129) dissolved in 1X PBS, at a volume of  
437 1% of body mass<sup>36</sup>. Hearts were collected 18hrs later as described above, and mid-ventricle  
438 cross sections were placed in Tissue-Tek O.C.T. Compound (Sakura #4583) and frozen in liquid  
439 nitrogen-cooled isopentane. Samples were cut to 5 $\mu$ m cross sections, mounted on glass slides,  
440 and labelled with wheat germ agglutinin-AlexaFluor 488 conjugate (ThermoFisher #W11261) at  
441 100 $\mu$ g/mL to outline each cell. Coverslips were mounted using ProLong Gold Antifade Mountant  
442 with DAPI. Slides were imaged on a Nikon Eclipse Ti-E fluorescence microscope. The average  
443 percentage of cardiomyocytes stained with EBD across 6 10x fields of view per heart was  
444 quantified.

445

446 **Statistics.**

447 All data are presented as mean  $\pm$  S.E.M. unless otherwise indicated. Statistical analyses  
448 were carried out with Prism 6.0 (GraphPad Software). A two-tailed t-test was used for direct  
449 comparisons between two groups. Welch's correction was used in cases of unequal variance.  
450 Kaplan Meier survival curves were compared using the log-rank (Mantel-Cox) test. Longitudinal  
451 echocardiographic studies were analyzed using 2-way ANOVA. Dunnett's post-hoc analysis  
452 was used for comparison to a single control, and Sidak's post-hoc analysis was used for  
453 comparisons across multiple groups. Grouped endpoint data were analyzed by 2-way ANOVA  
454 with Sidak's post-hoc analysis. Dose-response curves were evaluated by non-linear regression  
455 using a least squares ordinary fit, and corresponding EC<sub>50</sub> values were compared by extra-sum-  
456 of squares F-test. For all analyses, *P* values less than 0.05 were considered significant.

457

458

## RESULTS

### 459 **Development and validation of a genetic mouse model of conditional cardiomyocyte-** 460 **specific MCU overexpression.**

461 To investigate the contribution of mtCU-dependent  $mCa^{2+}$  uptake to cardiac stress  
462 responses *in vivo*, we developed a gain-of-function flox-stop mouse model ("flox-stop-MCU")  
463 allowing for Cre-dependent, temporally controlled expression of a human *MCU* transgene in  
464 adult mouse cardiomyocytes when crossed to mice with the  $\alpha$ -myosin heavy chain-MerCreMer  
465 ( $\alpha$ MHC-MCM; "MCM") allele (**Fig. 1A**). We selected a founder line with no MCU transgene  
466 expression in the absence of Cre, and with robust MCU transgene expression when crossed to  
467 mice with the constitutive, cardiomyocyte-restricted  $\alpha$ MHC-Cre allele (**Supplemental Fig. S1A**).  
468 Treatment of  $\alpha$ MHC-MCM x flox-stop-MCU ("MCU-Tg") mice with tamoxifen increased total  
469 cardiomyocyte MCU protein content within 1-wk after the first tamoxifen dose (**Fig. 1B**). Fast  
470 protein size-exclusion liquid chromatography (FPLC) of lysates of cardiac mitochondria isolated

471 from adult mice verified an approximate 20-fold increase in total MCU content in MCU-Tg  
472 mitochondria (**Fig. 1 C-E**). Overexpressed MCU in MCU-Tg cardiac mitochondria distributed  
473 into protein fractions ranging up to ~800kD, similar to the molecular weight distribution of  
474 endogenous mouse MCU (**Fig. 1 C-D**). These data suggest that overexpressed MCU  
475 assembles with the correct stoichiometry with other mtCU complex components to form intact,  
476 high-molecular weight uniporter channels within cardiac mitochondria. Despite robust  
477 mitochondrial MCU overexpression in MCU-Tg hearts, we did not detect any significant change  
478 in mRNA transcript expression of other mtCU components, nor of genes that mediate  $mCa^{2+}$   
479 efflux (**Supplemental Fig. S1 B-I**). This result also suggests that post-transcriptional regulatory  
480 mechanisms are likely influencing uniporter assembly and maintenance.

481 We next assessed the functional impact of increased cardiomyocyte MCU content by  
482 examining the effect of MCU overexpression on  $mCa^{2+}$  handling. Evaluation of acute  $mCa^{2+}$   
483 uptake in isolated, permeabilized adult mouse cardiomyocytes 1-wk after the start of tamoxifen  
484 treatment revealed an accelerated rate of  $mCa^{2+}$  uptake in MCU-Tg cells (**Fig. 2 A-B**). This  
485 indicates that overexpression of MCU alone is sufficient to increase uniporter function in adult  
486 mouse cardiomyocytes. Consistent with enhanced net  $mCa^{2+}$  uptake, MCU-Tg cardiomyocytes  
487 required the addition of fewer successive  $Ca^{2+}$  boluses to reach mitochondrial permeability  
488 transition, as indicated by a collapse of mitochondrial membrane potential,  $\Delta\Psi_m$ , and release of  
489  $Ca^{2+}$  from the mitochondrial matrix (**Fig. 2 C-D**). Isolated MCU-Tg cardiac mitochondria also  
490 exhibited increased swelling in response to a single 500- $\mu$ M  $Ca^{2+}$  bolus (**Fig. 2 E-G**), reflecting  
491 an increased propensity for  $mCa^{2+}$  uptake, which triggers subsequent permeability transition.

492 We then examined mitochondrial metabolism to assess whether the increased capacity  
493 for  $mCa^{2+}$  uptake observed with MCU overexpression had physiological consequences in intact  
494 adult cardiomyocytes. Inhibitory phosphorylation of the pyruvate dehydrogenase (PDH) E<sub>1</sub> $\alpha$   
495 subunit at serine 293 was decreased in MCU-Tg cardiomyocytes (**Fig. 3 A-B**), consistent with

496 increased  $mCa^{2+}$  uptake leading to net  $mCa^{2+}$  accumulation and increased activity of the  $mCa^{2+}$ -  
497 sensitive PDH phosphatase. MCU overexpression increased basal and ATP-linked oxygen  
498 consumption in isolated intact adult cardiomyocytes (**Fig. 3 C-D**), consistent with increased  
499 activity of PDH and TCA cycle dehydrogenases. These findings show that mitochondrial  
500 metabolism is increased in intact MCU-Tg cardiomyocytes, in support of the notion that basal  
501  $mCa^{2+}$  signaling is elevated in these cells under homeostatic conditions. Together, our *in vitro*  
502 results validate the MCU-Tg mouse model as a genetic tool for enhanced  $mCa^{2+}$  uptake, even in  
503 normal physiological contexts.

504

505 **mtCU-dependent  $mCa^{2+}$  uptake is required for contractile responsiveness to  $\beta$ -adrenergic**  
506 **stimulation *in vivo*, but drives cardiac maladaptation during prolonged stress.**

507 Following validation of the novel gain-of-function model, we compared mice with adult  
508 cardiomyocyte-specific MCU overexpression and mice with inducible, adult cardiomyocyte-  
509 specific *Mcu* deletion ( $\alpha$ MHC-MCM x *Mcu*<sup>*fl/fl*</sup>, *Mcu*-cKO)<sup>19</sup> to address the question of how mtCU-  
510 dependent  $mCa^{2+}$  uptake impacts the heart's immediate and long-term adaptation to a sustained  
511 increase in workload. After 5 days of tamoxifen administration, mice were allowed 16 days of  
512 tamoxifen washout to allow time for turnover of MCU protein (**Fig. 4A** and **Supplemental Fig.**  
513 **S4**). Three wks after the first tamoxifen dose, MCM, *Mcu*-cKO, and MCU-Tg mice were  
514 implanted with osmotic minipumps to deliver isoproterenol (70mg/kg/day) (**Fig. 4A**). We noted a  
515 slight decrease in survival among *Mcu*-cKO and MCU-Tg mice throughout 14 days of  
516 isoproterenol infusion, although this did not reach statistical significance (**Fig. 4B**). Isoproterenol  
517 infusion significantly increased cardiac contractility within 2 days of the start of isoproterenol  
518 infusion in MCM controls and this effect was abrogated in *Mcu*-cKO mice (**Fig. 4 C-E**). Despite  
519 this lack of contractile responsiveness to isoproterenol, we did not observe any detrimental  
520 effect of adult cardiomyocyte-specific *Mcu* deletion on contractile function under baseline

521 conditions (day 0), nor any measurable decline in cardiac contractility of *Mcu*-cKO hearts over  
522 14-day isoproterenol infusion (**Fig. 4 C-E**). Baseline cardiac function and the initial increase in  
523 cardiac contractility at 2 days of isoproterenol infusion were largely preserved in MCU-Tg hearts  
524 (**Fig. 4 C-E**). In contrast, by 7-14 days of isoproterenol infusion, MCU overexpression resulted in  
525 a significant decline in contractile function compared both to baseline and to MCM controls (**Fig.**  
526 **4 C-E**). These findings support the notion that increased capacity for  $mCa^{2+}$  uptake through the  
527 mtCU is not deleterious to cardiomyocyte function unless combined with an additional stressor,  
528 such as elevated cytosolic  $Ca^{2+}$  cycling due to chronic  $\beta$ -adrenergic stimulation. However, with  
529 sufficient duration of persistent stress signaling and intracellular  $Ca^{2+}$  ( $iCa^{2+}$ ) load, the resulting  
530 ongoing increase in  $mCa^{2+}$  uptake becomes detrimental to the overall contractile function of the  
531 heart.

532 Despite its disparate effects on the contractile performance of control MCM versus *Mcu*-  
533 cKO hearts, 14-days of isoproterenol infusion increased the heart weight-to-tibia length (HW/TL)  
534 ratio and cardiomyocyte cross-sectional area (CSA) to a similar extent in both genotypes (**Fig. 4**  
535 **F-G**). The increase in HW/TL after 14-days of isoproterenol was exaggerated in MCU-Tg hearts  
536 (**Fig. 4F**), although the increase in cardiomyocyte cross-sectional area was similar between all  
537 genotypes (**Fig. 4G**). Lung edema was also exaggerated in MCU-Tg mice (**Fig. 4H**), in  
538 agreement with their worsened contractile function compared to controls.

539

#### 540 **Increased mtCU activity enhances ROS production and sensitizes cardiomyocytes to cell** 541 **death *in vitro*.**

542 To explore the mechanisms by which increased MCU expression contributes to  
543 contractile dysfunction in response to sustained sympathetic stress, we tested the responses of  
544 isolated adult cardiomyocytes to cellular  $Ca^{2+}$  stress *in vitro*. MCU-Tg cardiomyocytes

545 demonstrated a tendency for increased cellular reactive oxygen species (ROS) production,  
546 indicated by a greater increase in DHE fluorescence, upon incubation with the Ca<sup>2+</sup> ionophore  
547 ionomycin (**Fig. 5A**). MCU-Tg cardiomyocytes also exhibited exaggerated ROS production in  
548 response to incubation with the respiratory complex III inhibitor, antimycin A (**Fig. 5B**). These  
549 results suggest that increased mCa<sup>2+</sup> uptake contributes to potentially deleterious ROS  
550 production. Consistent with this model, MCU-Tg cardiomyocytes displayed increased sensitivity  
551 to cell death induced by the Ca<sup>2+</sup> ionophore, ionomycin (**Fig. 5C**), and a trend towards increased  
552 membrane rupture during acute 1-hr isoproterenol stimulation (**Fig. 5D**). Together, these  
553 findings indicate that enhanced mCa<sup>2+</sup> uptake in MCU-Tg cardiomyocytes renders them more  
554 susceptible to oxidative stress and cell death when subjected to stimuli that increase cytosolic  
555 Ca<sup>2+</sup> concentration.

556

557 **Isoproterenol-induced contractile dysfunction and cardiomyocyte death in MCU-Tg mice**  
558 **is not rescued by genetic inhibition of the mPTP.**

559 Mitochondrial Ca<sup>2+</sup> overload is a classical stimulus for the generation of ROS and mPTP  
560 opening leading to necrotic cell death<sup>2, 37, 38</sup>, and oxidative stress itself can trigger mitochondrial  
561 permeability transition (mPT)<sup>31, 39, 40</sup>. Cardiomyocyte dropout due to apoptosis and/or necrosis  
562 has been proposed as a mechanism underlying the decline in contractile function in heart  
563 failure<sup>41, 42</sup>. Further, disruption of the mPTP is sufficient to rescue the lethal phenotype induced  
564 by rapid mCa<sup>2+</sup>-overload resulting from inducible NCLX deletion in adult cardiomyocytes<sup>25</sup>. We  
565 therefore hypothesized that the progressive contractile dysfunction we observed in MCU-Tg  
566 mice with isoproterenol infusion was caused by cardiomyocyte dropout due to mitochondrial  
567 Ca<sup>2+</sup> overload, activation of the mPTP, and subsequent necrosis. We crossed MCU-Tg and  
568 MCM mice to *Ppif*<sup>-/-</sup> mice lacking the mPTP regulator cyclophilin D (CypD) to test whether  
569 genetic inhibition of the mPTP is sufficient to rescue isoproterenol-induced contractile

570 dysfunction of MCU-Tg hearts. Western blotting confirmed loss of CypD protein in *Ppif*<sup>-/-</sup> mice,  
571 and persistence of MCU overexpression in MCU-Tg hearts on both wild-type and *Ppif*<sup>-/-</sup>  
572 backgrounds (**Fig. 6A; Supplemental Fig. S6A**). Interestingly, MCU overexpression also drove  
573 an increase in cardiac protein expression of the core mtCU component EMRE in mice on both  
574 wild-type and *Ppif*<sup>-/-</sup> backgrounds (**Fig. 6A; Supplemental Fig. S6B**), even though it did not  
575 affect levels of EMRE transcript (**Supplemental Fig. S1B**). Increased EMRE expression in  
576 MCU-Tg hearts persisted even after 14-days of isoproterenol infusion, but the extent of this  
577 increase in EMRE was somewhat attenuated with isoproterenol infusion in MCU-Tg x *Ppif*<sup>-/-</sup>  
578 hearts. (**Fig. 6A; Supplemental Fig. S6B**). Cardiac expression of the mtCU gatekeeper MICU1  
579 did not differ among genotypes under control conditions, but upon chronic isoproterenol  
580 infusion, MICU1 protein expression was decreased in MCU-Tg hearts and tended to be  
581 downregulated to a similar extent in MCU-Tg x *Ppif*<sup>-/-</sup> hearts (**Fig. 6A; Supplemental Fig. S6C**).  
582 These results suggest that modest post-translational compensatory changes to regulators of  
583 uniporter function occur in the context of MCU overexpression, and that these adaptations are  
584 also responsive to increased  $mCa^{2+}$  loading during isoproterenol stimulation.

585 Cyclophilin D deletion failed to rescue the contractile dysfunction observed in MCU-Tg  
586 hearts after 7-14 days of isoproterenol infusion (**Fig. 6 B-D**). CypD deletion also failed to  
587 attenuate the enhanced cardiac hypertrophy and lung edema observed in MCU-Tg mice with  
588 chronic isoproterenol infusion (**Fig. 6 E-F**). Therefore, we injected mice with Evans blue dye  
589 prior to heart collection to label necrotic cardiomyocytes and examine whether mPTP inhibition  
590 effectively limited cardiomyocyte necrosis. MCU-Tg hearts displayed significantly increased  
591 cardiomyocyte necrosis only after sustained isoproterenol stimulation (**Fig. 6 G-H**), consistent  
592 with their contractile phenotype. CypD deletion failed to decrease, and rather increased the  
593 extent of isoproterenol-induced cardiomyocyte necrosis in MCU-Tg hearts (**Fig. 6 G-H**). This  
594 finding aligns with the failure of CypD deletion to protect MCU-Tg hearts from isoproterenol-

595 induced contractile dysfunction. We incidentally noted that total protein expression of the  
596 pyruvate dehydrogenase (PDH) E<sub>1</sub>α subunit was reduced with isoproterenol infusion in MCU-Tg  
597 hearts and tended to be downregulated with isoproterenol infusion in MCU-Tg x *Ppif*<sup>-/-</sup> hearts  
598 (**Fig. 6A and Supplemental Fig. S6D**). Interestingly, the downregulation of PDH E<sub>1</sub>α subunit  
599 expression correlated strongly with the diminished left ventricular %FS observed in MCU-Tg and  
600 MCU-Tg x *Ppif*<sup>-/-</sup> hearts after 14-days of isoproterenol infusion (**Supplemental Fig. S6E**).

601

602

## DISCUSSION

603 Since the genetic identification of the mitochondrial calcium uniporter protein, MCU<sup>3, 4</sup>,  
604 research by numerous laboratories has provided insight into the molecular mechanisms by  
605 which the mitochondrial calcium uniporter channel assembles and is regulated in order to  
606 control  $_m\text{Ca}^{2+}$  uptake in the face of fluctuating cytosolic  $\text{Ca}^{2+}$  levels. Despite growing consensus  
607 around the physiological roles of acute  $_m\text{Ca}^{2+}$  uptake through the mtCU for physiological cardiac  
608 responses, and its contribution to acute ischemic cardiac injury, whether uniporter-dependent  
609  $_m\text{Ca}^{2+}$  uptake plays any causative role in the heart's functional responses to a sustained  
610 increase in cardiac workload has remained elusive. This question is particularly relevant for our  
611 understanding of the development and progression of forms of heart failure caused by chronic  
612 stresses, such as pressure- and/or neurohormonal overload in patients with hypertension. Our  
613 results in mice with adult, cardiomyocyte-specific loss- or gain- of MCU function reveal a strict  
614 requirement for uniporter-dependent  $_m\text{Ca}^{2+}$  uptake in enhancing cardiac contractility throughout  
615 the first few days of chronic catecholaminergic stimulation and support a causative role for  
616 persistent cardiomyocyte  $_m\text{Ca}^{2+}$  loading in driving eventual functional decompensation in  
617 response to sustained stress signaling. Interestingly, these findings differ from recent  
618 investigations of the role of uniporter-dependent  $_m\text{Ca}^{2+}$  uptake in the heart's response to chronic  
619 stress<sup>20, 43</sup>. These discrepancies warrant a more nuanced consideration of the effects of  $_m\text{Ca}^{2+}$



620 loading in general, and of  $mCa^{2+}$  uptake specifically through the mtCU versus through alternative  
621 pathways, in the development of heart disease. They also raise concern around the potential  
622 efficacy and appropriate point of therapeutic intervention for strategies that aim to increase  
623  $mCa^{2+}$  uptake to mitigate the progression of heart failure by enhancing mitochondrial energetics.  
624 Finally, our findings support a role for persistent  $mCa^{2+}$  loading in initiating cardiomyocyte death  
625 even independent of classical cyclophilin D-dependent activation of mitochondrial permeability  
626 transition, and highlight the need for further investigation into alternative mechanisms that  
627 mediate the pathological consequences of  $mCa^{2+}$  overload in the diseased heart.

628 We describe a novel genetic mouse model of tamoxifen-inducible overexpression of an  
629 untagged, human MCU transgene that will aid future investigations of tissue-specific mtCU  
630 function in the physiology and disease. Overexpressed MCU incorporated into high-molecular  
631 weight protein fractions of similar molecular weight to those containing endogenous mouse  
632 MCU, suggesting that overall native mtCU subunit stoichiometry and channel composition is  
633 maintained when the MCU content of cardiomyocyte mitochondria is increased (**Fig. 1**). Indeed,  
634 we found that transgenic MCU overexpression was associated with increased EMRE protein  
635 expression (**Fig. 6A; Supplemental Fig. S6 A-B**). The concerted upregulation of EMRE in  
636 MCU-Tg hearts occurs at the post-transcriptional level, as MCU overexpression did not alter  
637 levels of cardiac *Emre* transcript levels (**Supplemental Fig. S1B**). The fact that MICU1 protein  
638 expression was not also increased alongside increased MCU and EMRE content in MCU-Tg  
639 hearts (**Fig. 6A; Supplemental Fig. S6C**) raises the question of whether the MICU1/MCU ratio  
640 may be slightly diminished in this model as compensation for overall increases in uniporter  
641 density. This finding may also support a more minor role for MICU1 in the regulation of  
642 cardiomyocyte mtCU function, consistent with the conclusion by the Lederer and Boyman group  
643 that there is minimal gating of the mtCU in the mature heart<sup>44</sup>. Increased  $mCa^{2+}$  uptake in MCU-  
644 Tg hearts was well tolerated under unstressed conditions, at least through the 5-wks following

645 induction of MCU overexpression, as we did not observe any signs of pathological cardiac  
646 remodeling or evidence for cardiac dysfunction in the absence of isoproterenol stimulation  
647 (**Figs. 4 and 6**).

648 14-day infusion with high-dose isoproterenol tended to increase mortality in *Mcu*-cKO  
649 mice with adult cardiomyocyte-specific disruption of uniporter function (**Fig. 4B**). All deaths of  
650 *Mcu*-cKO mice occurred within the first few days of isoproterenol infusion, suggesting a critical  
651 protective role for mtCU-dependent  $mCa^{2+}$  uptake at the onset of a sudden increase in cardiac  
652 workload, cellular  $Ca^{2+}$  cycling, and energetic demand. This pattern recapitulates our earlier  
653 finding of increased mortality at the onset of high-dose angiotensin II + phenylephrine infusion in  
654 mice with cardiomyocyte-specific NCLX overexpression, which enhances  $mCa^{2+}$  efflux and so  
655 limits net  $mCa^{2+}$  accumulation<sup>35</sup>. In both studies, this increased mortality occurred prior to any  
656 overt decline in cardiac function, and we observed no additional deaths once the initial window  
657 of vulnerability had passed. We hypothesize that when  $mCa^{2+}$  accumulation is attenuated and  
658 cardiomyocytes are unable to quickly adapt metabolically to meet increased energetic demands  
659 imposed by adrenergic stimulation or other stressors, the resulting energetic stress disrupts  
660 cellular ion handling and so enhances the risk for sudden cardiac death. Further supporting this  
661 model, acute (~1-wk) transgenic cardiomyocyte MCUB overexpression to attenuate uniporter-  
662 dependent  $mCa^{2+}$  uptake impairs mitochondrial metabolism and increases mortality in mice  
663 subjected to cardiac ischemia-reperfusion<sup>29</sup>.

664 Our current finding that *Mcu*-cKO mice failed to exhibit the normal physiological increase  
665 in cardiac contractility over the first few days of isoproterenol infusion (**Fig. 4 C-E**) agrees with  
666 our previous work demonstrating cardiomyocyte mtCU function to be strictly required for the  
667 heart's acute sympathetic fight-or-flight response<sup>19, 29</sup>. It contrasts, though, with the proposal that  
668 slower, mtCU-independent routes of  $mCa^{2+}$  uptake are sufficient to increase mitochondrial  
669 metabolism to support an increase in cardiac work rate when sympathetic stimulation persists

670 for periods of roughly tens of minutes or longer<sup>20</sup>. At later timepoints, with 1-2-wks of sustained  
671 isoproterenol stimulation, we did not observe any detrimental effect of adult cardiomyocyte-  
672 specific *Mcu* deletion on cardiac function (**Fig. 4 C-E**). This finding differs from the recent report  
673 that cardiomyocyte *Mcu* deletion exaggerates cardiac dysfunction with 4-wk isoproterenol  
674 infusion<sup>43</sup>, though it should be noted that that study failed to directly compare appropriate  
675  $\alpha$ MHC-MCM controls with *Mcu*<sup>fl/fl</sup> x  $\alpha$ MHC-MCM mice, so it is difficult to distinguish the reported  
676 effects on heart function that may be specific to the loss of MCU function from effects that may  
677 be attributable to tamoxifen + Cre cardiotoxicity<sup>45-48</sup>. Another possible explanation for the  
678 discrepancies between our results and those of Wang et al.<sup>43</sup> is the difference in timing of the  
679 experimental endpoints used. We concluded our studies after just 2-wks of isoproterenol  
680 infusion, where no decline in cardiac function was yet detected in the control  $\alpha$ MHC-MCM  
681 genotype, whereas Wang et al. performed their measurements after 4-wks of isoproterenol  
682 treatment, a timepoint at which control animals did show appreciable cardiac decompensation.  
683 Nevertheless, our finding that transgenic MCU overexpression clearly accelerated the  
684 progression to cardiac failure and exaggerated hypertrophy during chronic isoproterenol infusion  
685 (**Fig. 4 C-F**) argues against the notion that  $mCa^{2+}$  uptake through the mtCU in cardiomyocytes  
686 strictly limits contractile dysfunction and pathological remodeling in response to chronic stress.  
687 Considering our results in light of the observations that neither global, nor cardiomyocyte-  
688 specific *Mcu* deletion, has any detrimental effect on cardiac function following a chronic increase  
689 in cardiac afterload<sup>20, 26</sup>, we conclude that loss of cardiomyocyte mtCU function *does not*  
690 necessarily accelerate the progression of failure in hearts subjected to chronic stress. A further  
691 point of disagreement between our model and the report by Wang et al.<sup>43</sup> is that they found a  
692 significant increase in cardiac mitochondrial MCU protein expression after both 2- and 4-wks of  
693 isoproterenol stimulation, while we observed no increase in MCU protein expression following  
694 isoproterenol infusion in any genotype (**Fig. 6A, Supplemental Fig. S6A**). This calls into doubt  
695 the idea that cardiac MCU protein expression and mtCU function must increase beyond steady-

696 state levels to enable the heart's long-term physiological adaptation to a sustained increase in  
697 workload. Indeed, despite upregulation of cardiac MCU protein after 4-wks of isoproterenol  
698 stimulation, Wang et al<sup>43</sup> also reported a profound downregulation of cardiac EMRE protein  
699 expression, which should limit  $mCa^{2+}$  uptake through the mtCU, likely as a compensatory  
700 response to increased MCU expression in order to limit ongoing  $mCa^{2+}$  overload.

701 Finally, despite our observation that mtCU function is required to increase cardiac output  
702 at the onset of adrenergic stimulation, we saw no effect of cardiomyocyte-specific *Mcu* deletion  
703 to alter the extent of hypertrophic remodeling that occurred with 14-days of isoproterenol  
704 infusion (**Fig. 4 F-G**).  $mCa^{2+}$  accumulation during neurohormonal stimulation nevertheless  
705 contributes to cardiomyocyte growth and cardiac hypertrophy<sup>35</sup>. Thus, this result suggests that  
706 alternative, uniporter-independent modes of  $mCa^{2+}$  uptake may contribute to this hypertrophic  
707 effect, even though these alternative routes of  $mCa^{2+}$  loading are insufficient to support an  
708 increased cardiac work rate. Our finding that transgenic cardiomyocyte MCU overexpression  
709 exaggerated hypertrophic remodeling with isoproterenol infusion (**Fig. 4F, Fig 6E**) provides  
710 additional support for the notion that increased  $mCa^{2+}$  content *per se* – regardless of the  
711 particular mechanism by which this occurs – contributes to cardiac hypertrophy.

712 The normal increase in cardiac contractility observed throughout the first few days of  
713 isoproterenol infusion was preserved in MCU-Tg hearts. However, within 1-2 wks of  
714 isoproterenol infusion, MCU-Tg hearts quickly decompensated towards failure (**Fig. 4, Fig. 6**).  
715 Along with a lack of early functional responsiveness to isoproterenol in *Mcu*-cKO mice, the  
716 timeframe over which detrimental effects of MCU overexpression became apparent emphasizes  
717 that continuous  $mCa^{2+}$  loading shifts from being an adaptive component of the heart's initial  
718 energetic response to stress, to eventually becoming a maladaptive response that hastens the  
719 development of contractile dysfunction. Our results regarding MCU overexpression again  
720 directly conflict with the study by Wang et al.<sup>43</sup>, which concluded that cardiomyocyte-specific

721 MCU overexpression protects the heart from hypertrophy and functional decompensation with  
722 chronic 4-wk isoproterenol infusion. Differences in these studies with respect the amount of time  
723 available for compensation to occur between the induction of cardiomyocyte MCU  
724 overexpression and onset of isoproterenol administration; the dose of isoproterenol used  
725 (70mg/kg/day here, lower 10mg/kg/day in Wang et al.<sup>43</sup>); and the extent of MCU overexpression  
726 (only ~4-fold in Wang et al.<sup>43</sup>) may help to account for these discrepancies. The greater degree  
727 of MCU overexpression achieved in our genetic mouse model, which was associated with  
728 accelerated progression towards heart failure with isoproterenol infusion, raises a critical  
729 concern for proposed therapeutic strategies that aim to boost  $mCa^{2+}$  accumulation to improve  
730 cardiac energetics and redox balance in the failing heart<sup>27, 49, 50</sup>. *What is the safety factor for*  
731 *enhancing mtCU function and augmenting  $mCa^{2+}$  uptake in heart disease? Any strategy seeking*  
732 *to increase  $mCa^{2+}$  signaling to enhance mitochondrial energetics will need to carefully balance*  
733 *this outcome against the risk of triggering deleterious  $mCa^{2+}$  overload, especially in settings*  
734 *where cytosolic  $Ca^{2+}$  signaling may be chronically elevated, as occurs in numerous heart*  
735 *conditions. Another pertinent point that will require further study is whether enhancing mtCU*  
736 *activity is in fact an appropriate goal to slow the development and progression of cardiac*  
737 *dysfunction and/or pathological remodeling in heart disease, or if this intervention may only be*  
738 *appropriate for a heart that is already in fulminant or end-stage heart failure.*

739 A key question arising from our *in vivo* results is how exactly cardiomyocyte-specific  
740 MCU overexpression accelerated contractile decompensation during isoproterenol stimulation.  
741 Genetic deletion of the mPTP regulator cyclophilin D that is required for mPTP function failed to  
742 attenuate isoproterenol-induced contractile dysfunction in MCU-Tg hearts, and surprisingly  
743 increased rather than decreased isoproterenol-induced cardiomyocyte necrosis in MCU-Tg  
744 animals (**Fig. 6**). Although deletion of cyclophilin D has been reported to sensitize hearts to  
745 physiological and pathological cardiac hypertrophy, and to exacerbate pressure overload-

746 induced contractile dysfunction, these phenotypes were not associated with increased rates of  
747 cardiomyocyte death as measured by TUNEL staining<sup>51</sup>. Our current results thus raise two  
748 intriguing questions regarding the response of MCU-Tg hearts to chronic isoproterenol infusion:  
749 1) *how does deletion of cyclophilin D exacerbate isoproterenol-induced cardiomyocyte death in*  
750 *MCU-Tg hearts?* and 2) *what is the mechanism by which chronic  $mCa^{2+}$  overload caused*  
751 *cardiomyocyte death and contractile dysfunction, if not through classical CypD-regulated*  
752 *mitochondrial permeability transition?* While answering these questions is beyond the scope of  
753 the current study, several relevant points for future investigation are addressed below.

754 First, transient opening of the mitochondrial permeability transition pore has been  
755 proposed as an alternative physiological mechanism for  $Ca^{2+}$  to exit the mitochondrial matrix,  
756 thus mitigating the risk of deleterious cardiomyocyte  $mCa^{2+}$  overload<sup>51, 52</sup>. Deletion of CypD alone  
757 did not cause contractile dysfunction or increase cardiomyocyte death either under basal  
758 conditions or with isoproterenol stress. Likewise, the combination of CypD deletion and  
759 transgenic MCU overexpression was not deleterious at baseline, and exacerbated  
760 cardiomyocyte death only upon chronic adrenergic stimulation (**Fig. 6**). During isoproterenol  
761 infusion, it is plausible that increased capacity for  $mCa^{2+}$  uptake and diminished capacity for  
762  $mCa^{2+}$  efflux in MCU-Tg x *Ppif*<sup>-/-</sup> hearts could combine to drastically augment  $mCa^{2+}$  overload.  
763 Although MCU overexpression was maintained throughout 14-days of isoproterenol treatment in  
764 both MCU-Tg and MCU-Tg x *Ppif*<sup>-/-</sup> hearts (**Fig. 6A, Supplemental Fig. S6A**), chronic  
765 isoproterenol infusion significantly decreased EMRE protein expression compared to sham  
766 animals in MCU-Tg, *Ppif*<sup>-/-</sup> hearts. Such downregulation of EMRE is proposed as a  
767 compensatory mechanism to limit ongoing  $mCa^{2+}$  overload<sup>53</sup>. That downregulation of EMRE with  
768 isoproterenol stimulation occurred exclusively in MCU-Tg x *Ppif*<sup>-/-</sup> hearts suggests that this  
769 group experienced the greatest degree of net  $mCa^{2+}$  loading, reaching  $mCa^{2+}$  levels sufficient to  
770 trigger compensatory remodeling of the mtCU. We therefore hypothesize that the greater

771 degree of cardiomyocyte death observed in MCU-Tg x *Ppif*<sup>-/-</sup> hearts with chronic isoproterenol  
772 infusion is directly attributable to a greater degree of sustained  $mCa^{2+}$  overload in this  
773 experimental group.

774 Second, the specific mechanism(s) by which exaggerated  $mCa^{2+}$  overload in MCU-Tg  
775 and MCU-Tg x *Ppif*<sup>-/-</sup> hearts caused cardiomyocyte death and contractile dysfunction remains to  
776 be elucidated. Since cardiomyocyte necrosis was exaggerated with CypD deletion, the  
777 mechanism for this cell death associated with chronic excess  $mCa^{2+}$  loading appears not to be  
778 attributable to classical, CypD-regulated high-conductance opening of the mPTP. An alternative  
779 possibility is that chronic  $mCa^{2+}$  overload in isoproterenol-treated MCU-Tg and MCU-Tg x *Ppif*<sup>-/-</sup>  
780 hearts triggers mitochondrial dysfunction, permeability transition, and cell death through the  
781 activation of mitochondrial calpains, a class of calcium sensitive proteases, and an increase in  
782 local proteolysis. Such a model would predict that a greater degree of  $mCa^{2+}$  loading could lead  
783 to more mitochondrial calpain activation in isoproterenol-treated MCU-Tg x *Ppif*<sup>-/-</sup> mice, thus  
784 explaining the increased amount of cardiomyocyte death observed in this group. Indeed,  
785 mitochondrial calpains can elicit permeability transition in the context of acute  $mCa^{2+}$  overload  
786 during cardiac ischemia-reperfusion injury<sup>54-56</sup>. It remains to be determined whether excessive  
787 mitochondrial calpain activity likewise contributes to mPT, cardiomyocyte death, and contractile  
788 dysfunction resulting from persistent  $mCa^{2+}$  stress.

789 In summary, this study provides evidence for a causal role of mtCU-dependent  $mCa^{2+}$   
790 uptake in both early physiological adaptations to an increase in cardiac workload, and the  
791 maladaptive processes promoted by sustained cardiac demand that can result in heart failure.  
792 Our finding of  $mCa^{2+}$ -driven cardiomyocyte necrosis that is exacerbated by loss of CypD  
793 emphasizes a need for deeper understanding of alternative pathways that can trigger  
794 cardiomyocyte death and contractile dysfunction in the failing heart. It also strengthens a model  
795 in which the classical mPTP has beneficial physiological roles to limit deleterious  $mCa^{2+}$  overload

796 in the face of chronic  $mCa^{2+}$  stress, distinct from its role to initiate acute cell death. Future  
797 investigations should prioritize longitudinal studies, rather than functional measurements at  
798 single endpoints, to better define the role of  $mCa^{2+}$  signaling throughout the development and  
799 progression of heart disease, and to determine the appropriate stages throughout this process  
800 for therapeutic intervention with strategies targeting  $mCa^{2+}$  flux. Finally, given the endogenous  
801 counterregulatory mechanisms that appear to balance the risk of  $mCa^{2+}$  overload with the heart's  
802 dependence on  $Ca^{2+}$ -regulated mitochondrial energy metabolism, we propose that interventions  
803 that unidirectionally block or enhance  $mCa^{2+}$  uptake in chronic heart disease may ultimately be  
804 of limited therapeutic efficacy. We instead suggest that improving the dynamic flexibility of  $mCa^{2+}$   
805 exchange by targeting the regulatory mechanisms controlling  $mCa^{2+}$  flux may be a more  
806 effective strategy for the mitigation of chronic heart failure.

807

808

## 809 **AUTHOR CONTRIBUTIONS**

810

811 Conception and design of research: J.F.G. and J.W.E.

812 Performed experiments: J.F.G., T.S.L., J.P.L., A.S.M., E.K.M., A.N.H., and P.J.

813 Analyzed data: J.F.G., T.S.L, and J.W.E.

814 Interpreted results of experiments: J.F.G., T.S.L., P.J., and J.W.E.

815 Prepared figures: J.F.G.

816 Drafted manuscript: J.F.G.

817 Edited and revised manuscript: J.F.G. and J.W.E.

818 Approved final version of manuscript: J.F.G., T.S.L., J.P.L., A.S.M., E.K.M., A.N.H., P.J., and

819 J.W.E.

820



821

## FUNDING

822 The research was supported by the NIH (T32HL091804 and F32HL151146 to J.F.G.;  
823 R00AG065445 to P.J.; P01HL147841, R01HL142271, R01HL136954, P01HL134608, and  
824 R01HL123966 to J.W.E.) and the American Heart Association (17PRE33460423 to J.P.L;  
825 20EIA35320226 to J.W.E.).

826

827

828

## DISCLOSURES

829 J.F.G is a paid consultant for Mitobridge. J.W.E. is a paid consultant for Mitobridge and  
830 Janssen.

831

832

833

## REFERENCES

834

- 835 1. Garbincius JF, Luongo TS and Elrod JW. The debate continues - What is the role of  
836 MCU and mitochondrial calcium uptake in the heart? *Journal of molecular and cellular*  
837 *cardiology*. 2020;143:163-174.
- 838 2. Garbincius JF and Elrod JW. Mitochondrial calcium exchange in physiology and disease.  
839 *Physiological reviews*. 2022;102:893-992.
- 840 3. Baughman JM, Perocchi F, Girgis HS, Plovanich M, Belcher-Timme CA, Sancak Y, Bao  
841 XR, Strittmatter L, Goldberger O, Bogorad RL, Kotliansky V and Mootha VK. Integrative  
842 genomics identifies MCU as an essential component of the mitochondrial calcium uniporter.  
843 *Nature*. 2011;476:341-5.

- 844 4. De Stefani D, Raffaello A, Teardo E, Szabo I and Rizzuto R. A forty-kilodalton protein of  
845 the inner membrane is the mitochondrial calcium uniporter. *Nature*. 2011;476:336-40.
- 846 5. Sancak Y, Markhard AL, Kitami T, Kovacs-Bogdan E, Kamer KJ, Udeshi ND, Carr SA,  
847 Chaudhuri D, Clapham DE, Li AA, Calvo SE, Goldberger O and Mootha VK. EMRE is an  
848 essential component of the mitochondrial calcium uniporter complex. *Science*. 2013;342:1379-  
849 82.
- 850 6. Tsai MF, Phillips CB, Ranaghan M, Tsai CW, Wu Y, Williams C and Miller C. Dual  
851 functions of a small regulatory subunit in the mitochondrial calcium uniporter complex. *Elife*.  
852 2016;5.
- 853 7. Wang Y, Nguyen NX, She J, Zeng W, Yang Y, Bai XC and Jiang Y. Structural  
854 Mechanism of EMRE-Dependent Gating of the Human Mitochondrial Calcium Uniporter. *Cell*.  
855 2019;177:1252-1261 e13.
- 856 8. Raffaello A, De Stefani D, Sabbadin D, Teardo E, Merli G, Picard A, Checchetto V, Moro  
857 S, Szabo I and Rizzuto R. The mitochondrial calcium uniporter is a multimer that can include a  
858 dominant-negative pore-forming subunit. *The EMBO journal*. 2013;32:2362-76.
- 859 9. Perocchi F, Gohil VM, Girgis HS, Bao XR, McCombs JE, Palmer AE and Mootha VK.  
860 MICU1 encodes a mitochondrial EF hand protein required for Ca(2+) uptake. *Nature*.  
861 2010;467:291-6.
- 862 10. Hoffman NE, Chandramoorthy HC, Shamugapriya S, Zhang X, Rajan S,  
863 Mallilankaraman K, Gandhirajan RK, Vagnozzi RJ, Ferrer LM, Sreekrishnanilayam K,  
864 Natarajaseenivasan K, Vallem S, Force T, Choi ET, Cheung JY and Madesh M. MICU1 motifs  
865 define mitochondrial calcium uniporter binding and activity. *Cell Rep*. 2013;5:1576-1588.
- 866 11. Plovanich M, Bogorad RL, Sancak Y, Kamer KJ, Strittmatter L, Li AA, Girgis HS,  
867 Kuchimanchi S, De Groot J, Speciner L, Taneja N, Oshea J, Koteliansky V and Mootha VK.  
868 MICU2, a paralog of MICU1, resides within the mitochondrial uniporter complex to regulate  
869 calcium handling. *PLoS One*. 2013;8:e55785.

- 870 12. Csordas G, Golenar T, Seifert EL, Kamer KJ, Sancak Y, Perocchi F, Moffat C, Weaver  
871 D, de la Fuente Perez S, Bogorad R, Koteliensky V, Adijanto J, Mootha VK and Hajnoczky G.  
872 MICU1 controls both the threshold and cooperative activation of the mitochondrial Ca<sup>2</sup>(+)  
873 uniporter. *Cell Metab.* 2013;17:976-87.
- 874 13. Patron M, Checchetto V, Raffaello A, Teardo E, Vecellio Reane D, Mantoan M,  
875 Granatiero V, Szabo I, De Stefani D and Rizzuto R. MICU1 and MICU2 finely tune the  
876 mitochondrial Ca<sup>2+</sup> uniporter by exerting opposite effects on MCU activity. *Molecular cell.*  
877 2014;53:726-37.
- 878 14. Mallilankaraman K, Doonan P, Cardenas C, Chandramoorthy HC, Muller M, Miller R,  
879 Hoffman NE, Gandhirajan RK, Molgo J, Birnbaum MJ, Rothberg BS, Mak DO, Foskett JK and  
880 Madesh M. MICU1 is an essential gatekeeper for MCU-mediated mitochondrial Ca<sup>2+</sup> uptake  
881 that regulates cell survival. *Cell.* 2012;151:630-44.
- 882 15. Patron M, Granatiero V, Espino J, Rizzuto R and De Stefani D. MICU3 is a tissue-  
883 specific enhancer of mitochondrial calcium uptake. *Cell death and differentiation.* 2019;26:179-  
884 195.
- 885 16. Mallilankaraman K, Cardenas C, Doonan PJ, Chandramoorthy HC, Irrinki KM, Golenar  
886 T, Csordas G, Madireddi P, Yang J, Muller M, Miller R, Kolesar JE, Molgo J, Kaufman B,  
887 Hajnoczky G, Foskett JK and Madesh M. MCUR1 is an essential component of mitochondrial  
888 Ca<sup>2+</sup> uptake that regulates cellular metabolism. *Nature cell biology.* 2012;14:1336-43.
- 889 17. Tomar D, Dong Z, Shanmughapriya S, Koch DA, Thomas T, Hoffman NE, Timbalia SA,  
890 Goldman SJ, Breves SL, Corbally DP, Nemani N, Fairweather JP, Cutri AR, Zhang X, Song J,  
891 Jana F, Huang J, Barrero C, Rabinowitz JE, Luongo TS, Schumacher SM, Rockman ME,  
892 Dietrich A, Merali S, Caplan J, Stathopoulos P, Ahima RS, Cheung JY, Houser SR, Koch WJ,  
893 Patel V, Gohil VM, Elrod JW, Rajan S and Madesh M. MCUR1 Is a Scaffold Factor for the MCU  
894 Complex Function and Promotes Mitochondrial Bioenergetics. *Cell Rep.* 2016;15:1673-85.

- 895 18. Wu Y, Rasmussen TP, Koval OM, Joiner ML, Hall DD, Chen B, Luczak ED, Wang Q,  
896 Rokita AG, Wehrens XH, Song LS and Anderson ME. The mitochondrial uniporter controls fight  
897 or flight heart rate increases. *Nat Commun.* 2015;6:6081.
- 898 19. Luongo TS, Lambert JP, Yuan A, Zhang X, Gross P, Song J, Shanmughapriya S, Gao  
899 E, Jain M, Houser SR, Koch WJ, Cheung JY, Madesh M and Elrod JW. The Mitochondrial  
900 Calcium Uniporter Matches Energetic Supply with Cardiac Workload during Stress and  
901 Modulates Permeability Transition. *Cell Rep.* 2015;12:23-34.
- 902 20. Kwong JQ, Lu X, Correll RN, Schwanekamp JA, Vagnozzi RJ, Sargent MA, York AJ,  
903 Zhang J, Bers DM and Molkenstein JD. The Mitochondrial Calcium Uniporter Selectively Matches  
904 Metabolic Output to Acute Contractile Stress in the Heart. *Cell Rep.* 2015;12:15-22.
- 905 21. Pan X, Liu J, Nguyen T, Liu C, Sun J, Teng Y, Fergusson MM, Rovira, II, Allen M,  
906 Springer DA, Aponte AM, Gucek M, Balaban RS, Murphy E and Finkel T. The physiological role  
907 of mitochondrial calcium revealed by mice lacking the mitochondrial calcium uniporter. *Nature*  
908 *cell biology.* 2013;15:1464-72.
- 909 22. Zaglia T, Ceriotti P, Campo A, Borile G, Armani A, Carullo P, Prando V, Coppini R, Vida  
910 V, Stolen TO, Ulrik W, Cerbai E, Stellin G, Faggian G, De Stefani D, Sandri M, Rizzuto R, Di  
911 Lisa F, Pozzan T, Catalucci D and Mongillo M. Content of mitochondrial calcium uniporter  
912 (MCU) in cardiomyocytes is regulated by microRNA-1 in physiologic and pathologic  
913 hypertrophy. *Proceedings of the National Academy of Sciences of the United States of America.*  
914 2017;114:E9006-E9015.
- 915 23. Yu Z, Chen R, Li M, Yu Y, Liang Y, Han F, Qin S, Chen X, Su Y and Ge J. Mitochondrial  
916 calcium uniporter inhibition provides cardioprotection in pressure overload-induced heart failure  
917 through autophagy enhancement. *Int J Cardiol.* 2018;271:161-168.
- 918 24. Paillard M, Huang KT, Weaver D, Lambert JP, Elrod JW and Hajnoczky G. Altered  
919 composition of the mitochondrial Ca(2+)uniporter in the failing human heart. *Cell Calcium.*  
920 2022;105:102618.

- 921 25. Luongo TS, Lambert JP, Gross P, Nwokedi M, Lombardi AA, Shanmughapriya S,  
922 Carpenter AC, Kolmetzky D, Gao E, van Berlo JH, Tsai EJ, Molkentin JD, Chen X, Madesh M,  
923 Houser SR and Elrod JW. The mitochondrial Na(+)/Ca(2+) exchanger is essential for Ca(2+)  
924 homeostasis and viability. *Nature*. 2017;545:93-97.
- 925 26. Holmstrom KM, Pan X, Liu JC, Menazza S, Liu J, Nguyen TT, Pan H, Parks RJ,  
926 Anderson S, Noguchi A, Springer D, Murphy E and Finkel T. Assessment of cardiac function in  
927 mice lacking the mitochondrial calcium uniporter. *Journal of molecular and cellular cardiology*.  
928 2015;85:178-82.
- 929 27. Liu T, Yang N, Sidor A and O'Rourke B. MCU Overexpression Rescues Inotropy and  
930 Reverses Heart Failure by Reducing SR Ca(2+) Leak. *Circ Res*. 2021.
- 931 28. Garbincius JF and Elrod JW. Is the Failing Heart Starved of Mitochondrial Calcium? *Circ*  
932 *Res*. 2021;128:1205-1207.
- 933 29. Lambert JP, Luongo TS, Tomar D, Jadiya P, Gao E, Zhang X, Lucchese AM, Kolmetzky  
934 DW, Shah NS and Elrod JW. MCUB Regulates the Molecular Composition of the Mitochondrial  
935 Calcium Uniporter Channel to Limit Mitochondrial Calcium Overload During Stress. *Circulation*.  
936 2019;140:1720-1733.
- 937 30. Oka T, Maillet M, Watt AJ, Schwartz RJ, Aronow BJ, Duncan SA and Molkentin JD.  
938 Cardiac-specific deletion of Gata4 reveals its requirement for hypertrophy, compensation, and  
939 myocyte viability. *Circ Res*. 2006;98:837-45.
- 940 31. Baines CP, Kaiser RA, Purcell NH, Blair NS, Osinska H, Hambleton MA, Brunskill EW,  
941 Sayen MR, Gottlieb RA, Dorn GW, Robbins J and Molkentin JD. Loss of cyclophilin D reveals a  
942 critical role for mitochondrial permeability transition in cell death. *Nature*. 2005;434:658-62.
- 943 32. Kabaeva Z, Zhao M and Michele DE. Blebbistatin extends culture life of adult mouse  
944 cardiac myocytes and allows efficient and stable transgene expression. *Am J Physiol Heart Circ*  
945 *Physiol*. 2008;294:H1667-74.

- 946 33. Frezza C, Cipolat S and Scorrano L. Organelle isolation: functional mitochondria from  
947 mouse liver, muscle and cultured fibroblasts. *Nat Protoc.* 2007;2:287-95.
- 948 34. Readnower RD, Brainard RE, Hill BG and Jones SP. Standardized bioenergetic profiling  
949 of adult mouse cardiomyocytes. *Physiol Genomics.* 2012;44:1208-13.
- 950 35. Garbincius JF, Luongo TS, Jadiya P, Hildebrand AN, Kolmetzky DW, Mangold AS, Roy  
951 R, Ibeti J, Nwokedi M, Koch WJ and Elrod JW. Enhanced NCLX-dependent mitochondrial  
952 Ca(2+) efflux attenuates pathological remodeling in heart failure. *Journal of molecular and*  
953 *cellular cardiology.* 2022;167:52-66.
- 954 36. Hamer PW, McGeachie JM, Davies MJ and Grounds MD. Evans Blue Dye as an in vivo  
955 marker of myofibre damage: optimising parameters for detecting initial myofibre membrane  
956 permeability. *J Anat.* 2002;200:69-79.
- 957 37. Rasola A and Bernardi P. Mitochondrial permeability transition in Ca(2+)-dependent  
958 apoptosis and necrosis. *Cell Calcium.* 2011;50:222-33.
- 959 38. Elrod JW and Molkenin JD. Physiologic functions of cyclophilin D and the mitochondrial  
960 permeability transition pore. *Circ J.* 2013;77:1111-22.
- 961 39. Nakagawa T, Shimizu S, Watanabe T, Yamaguchi O, Otsu K, Yamagata H, Inohara H,  
962 Kubo T and Tsujimoto Y. Cyclophilin D-dependent mitochondrial permeability transition  
963 regulates some necrotic but not apoptotic cell death. *Nature.* 2005;434:652-8.
- 964 40. Schinzel AC, Takeuchi O, Huang Z, Fisher JK, Zhou Z, Rubens J, Hetz C, Danial NN,  
965 Moskowitz MA and Korsmeyer SJ. Cyclophilin D is a component of mitochondrial permeability  
966 transition and mediates neuronal cell death after focal cerebral ischemia. *Proceedings of the*  
967 *National Academy of Sciences of the United States of America.* 2005;102:12005-10.
- 968 41. Foo RS, Mani K and Kitsis RN. Death begets failure in the heart. *J Clin Invest.*  
969 2005;115:565-71.
- 970 42. Konstantinidis K, Whelan RS and Kitsis RN. Mechanisms of cell death in heart disease.  
971 *Arterioscler Thromb Vasc Biol.* 2012;32:1552-62.

- 972 43. Wang P, Xu S, Xu J, Xin Y, Lu Y, Zhang H, Zhou B, Xu H, Sheu SS, Tian R and Wang  
973 W. Elevated MCU Expression by CaMKII $\delta$  Limits Pathological Cardiac Remodeling.  
974 *Circulation*. 2022;145:1067-1083.
- 975 44. Wescott AP, Kao JPY, Lederer WJ and Boyman L. Voltage-energized Calcium-sensitive  
976 ATP Production by Mitochondria. *Nat Metab*. 2019;1:975-984.
- 977 45. Pugach EK, Richmond PA, Azofeifa JG, Dowell RD and Leinwand LA. Prolonged Cre  
978 expression driven by the alpha-myosin heavy chain promoter can be cardiotoxic. *Journal of*  
979 *molecular and cellular cardiology*. 2015;86:54-61.
- 980 46. Rehmani T, Salih M and Tuana BS. Cardiac-Specific Cre Induces Age-Dependent  
981 Dilated Cardiomyopathy (DCM) in Mice. *Molecules*. 2019;24.
- 982 47. Bersell K, Choudhury S, Mollova M, Polizzotti BD, Ganapathy B, Walsh S, Wadugu B,  
983 Arab S and Kuhn B. Moderate and high amounts of tamoxifen in alphaMHC-MerCreMer mice  
984 induce a DNA damage response, leading to heart failure and death. *Disease models &*  
985 *mechanisms*. 2013;6:1459-69.
- 986 48. Koitabashi N, Bedja D, Zaiman AL, Pinto YM, Zhang M, Gabrielson KL, Takimoto E and  
987 Kass DA. Avoidance of transient cardiomyopathy in cardiomyocyte-targeted tamoxifen-induced  
988 MerCreMer gene deletion models. *Circ Res*. 2009;105:12-5.
- 989 49. Liu T and O'Rourke B. Enhancing mitochondrial Ca<sup>2+</sup> uptake in myocytes from failing  
990 hearts restores energy supply and demand matching. *Circ Res*. 2008;103:279-88.
- 991 50. Liu T, Takimoto E, Dimaano VL, DeMazumder D, Kettlewell S, Smith G, Sidor A,  
992 Abraham TP and O'Rourke B. Inhibiting mitochondrial Na<sup>+</sup>/Ca<sup>2+</sup> exchange prevents sudden  
993 death in a Guinea pig model of heart failure. *Circ Res*. 2014;115:44-54.
- 994 51. Elrod JW, Wong R, Mishra S, Vagnozzi RJ, Sakthivel B, Goonasekera SA, Karch J,  
995 Gabel S, Farber J, Force T, Brown JH, Murphy E and Molkenstein JD. Cyclophilin D controls  
996 mitochondrial pore-dependent Ca<sup>2+</sup> exchange, metabolic flexibility, and propensity for heart  
997 failure in mice. *J Clin Invest*. 2010;120:3680-7.

- 998 52. Lu X, Kwong JQ, Molkentin JD and Bers DM. Individual Cardiac Mitochondria Undergo  
999 Rare Transient Permeability Transition Pore Openings. *Circ Res.* 2016;118:834-41.
- 1000 53. Liu JC, Liu J, Holmstrom KM, Menazza S, Parks RJ, Fergusson MM, Yu ZX, Springer  
1001 DA, Halsey C, Liu C, Murphy E and Finkel T. MICU1 Serves as a Molecular Gatekeeper to  
1002 Prevent In Vivo Mitochondrial Calcium Overload. *Cell Rep.* 2016;16:1561-1573.
- 1003 54. Shintani-Ishida K and Yoshida K. Mitochondrial m-calpain opens the mitochondrial  
1004 permeability transition pore in ischemia-reperfusion. *Int J Cardiol.* 2015;197:26-32.
- 1005 55. Thompson J, Hu Y, Lesnefsky EJ and Chen Q. Activation of mitochondrial calpain and  
1006 increased cardiac injury: beyond AIF release. *Am J Physiol Heart Circ Physiol.* 2016;310:H376-  
1007 84.
- 1008 56. Arrington DD, Van Vleet TR and Schnellmann RG. Calpain 10: a mitochondrial calpain  
1009 and its role in calcium-induced mitochondrial dysfunction. *Am J Physiol Cell Physiol.*  
1010 2006;291:C1159-71.
- 1011
- 1012
- 1013
- 1014
- 1015
- 1016
- 1017
- 1018
- 1019



1020 **Figure Titles and Legends**

1021 **Figure 1: Mouse model of inducible, adult cardiomyocyte-specific MCU transgene**

1022 **expression. A)** Genetic approach for conditional overexpression of MCU transgene in adult  
1023 mouse cardiomyocytes. **B)** Western blots for tamoxifen-inducible overexpression of MCU in  
1024 adult cardiomyocytes isolated from  $\alpha$ MHC-MCM (MCM) and  $\alpha$ MHC-MCM x flox-stop-MCU  
1025 (MCU-Tg) mice. Total OXPHOS complexes I-V are shown as a mitochondrial loading control.  
1026 Corresponding full-length blots are shown in Supplemental Fig. S2. ( $n=5$  mice/genotype). **C)**  
1027 Western blots for MCU of fast protein size-exclusion liquid chromatography fractions of cardiac  
1028 mitochondria isolated from MCM and MCU-Tg hearts. Brackets indicate quantified mature,  
1029 mitochondrial targeting sequence-cleaved MCU. Corresponding full-length blots are shown in  
1030 Supplemental Fig. S2. **D)** Relative distribution of MCU in size exclusion chromatography  
1031 fractions of isolated cardiac mitochondria. ( $n=4$  mice per genotype). **E)** Quantification of total  
1032 MCU protein across FPLC fractions from MCM and MCU-Tg cardiac mitochondria. Data  
1033 analyzed by unpaired, two-tailed  $t$ -test.  $*p<0.05$ . ( $n=4$  mice/genotype).

1034

1035 **Figure 2: Transgenic MCU overexpression increases  $_m\text{Ca}^{2+}$  uptake in adult mouse**

1036 **cardiomyocytes. A)** Mean traces showing  $_m\text{Ca}^{2+}$  uptake in permeabilized adult  $\alpha$ MHC-MCM  
1037 (MCM) and  $\alpha$ MHC-MCM x flox-stop-MCU (MCU-Tg) mouse cardiomyocytes in response to 5 or  
1038  $10\mu\text{M}$   $\text{Ca}^{2+}$  bolus delivered at indicated timepoints. Cardiomyocytes were isolated 1-wk after the  
1039 start of tamoxifen treatments and permeabilized with digitonin. Measurements were performed  
1040 in the presence of CGP-37157 to inhibit  $_m\text{Ca}^{2+}$  efflux through NCLX and thapsigargin to inhibit  
1041  $\text{Ca}^{2+}$  uptake through SERCA. Fura-FF fluorescence represents extra-mitochondrial, bath  $\text{Ca}^{2+}$   
1042 content. JC-1 fluorescence represents mitochondrial membrane potential,  $\Delta\Psi_m$ . Traces are  
1043 mean of 11 recordings/genotype. **B)** Quantification of average  $_m\text{Ca}^{2+}$  uptake rate for each  
1044 mouse, measured over the first 30s following the peak of the  $10\mu\text{M}$   $\text{Ca}^{2+}$  bolus. Data analyzed

1045 by unpaired, two-tailed *t*-test. \**p*<0.05. (*n*=4 mice per genotype). **C**) Ca<sup>2+</sup> retention capacity  
1046 (CRC) assay in permeabilized adult mouse cardiomyocytes. 10μM Ca<sup>2+</sup> boluses were added  
1047 every 60s as indicated. Measurements were made in the presence of thapsigargin. Traces are  
1048 mean of 6 recordings from MCM mice and 7 recordings from MCU-Tg mice. **D**) Average number  
1049 of 10μM Ca<sup>2+</sup> boluses tolerated in CRC assay before Dy<sub>m</sub> (mitochondrial membrane potential)  
1050 collapse for each mouse. Data analyzed by unpaired, two-tailed *t*-test. \**p*<0.05. (*n*=3  
1051 mice/genotype). **E**) Assay showing swelling (decrease in absorbance) of isolated cardiac  
1052 mitochondria in response to addition of a 500μM Ca<sup>2+</sup> bolus. Traces are mean ± S.E.M. (*n*=3  
1053 mice/genotype). Quantification of mitochondrial swelling (area over the curve, A.O.C.) (**F**) and  
1054 maximal swelling rate (**G**) in isolated cardiac mitochondria in response to addition of a 500μM  
1055 Ca<sup>2+</sup> bolus. Data analyzed by unpaired, two-tailed *t*-test. \*\**p*<0.01. (*n*=3 mice/genotype).

1056

1057 **Figure 3: MCU overexpression increases basal mitochondrial respiration in adult mouse**  
1058 **cardiomyocytes.** **A**) Western blots for pyruvate dehydrogenase (PDH) phosphorylation in adult  
1059 cardiomyocytes isolated from αMHC-MCM (MCM) and αMHC-MCM x flox-stop-MCU (MCU-Tg)  
1060 mice 1-wk after the administration of tamoxifen. Blots were performed using the same  
1061 cardiomyocyte samples as shown in Fig. 1B. Corresponding full-length blots are shown in  
1062 Supplemental Fig. S3. **B**) Semi-quantification of inhibitory PDH E1α S293 phosphorylation. Data  
1063 analyzed by unpaired, two-tailed *t*-test. \**p*<0.05. (*n*=5 mice per genotype). **C**) Extracellular flux  
1064 analysis of oxygen consumption rate (OCR) in isolated adult mouse cardiomyocytes. Traces  
1065 represent mean ± S.E.M.; 9 mice/genotype. **D**) Quantification of basal respiration, ATP-linked  
1066 respiration, proton leak, non-mitochondrial respiration, respiratory reserve capacity, and  
1067 maximal respiration. Data analyzed by unpaired, two-tailed *t*-test. \**p*<0.05, \*\**p*<0.01. (*n*=9  
1068 mice/genotype).

1069

1070 **Figure 4: Cardiomyocyte *Mcu* deletion prevents isoproterenol-induced increase in**  
1071 **cardiac contractility, while MCU overexpression predisposes to isoproterenol-induced**  
1072 **contractile dysfunction. A)** Experimental timeline of tamoxifen administration, isoproterenol  
1073 minipump implant surgery, and *in vivo* functional analysis in  $\alpha$ MHC-MCM (MCM),  $\alpha$ MHC-MCM x  
1074 *Mcu<sup>fl/fl</sup>* (*Mcu*-cKO), and  $\alpha$ MHC-MCM x flox-stop-MCU (MCU-Tg) mice. **B)** Kaplan-Meier survival  
1075 curves of MCM, *Mcu*-cKO, and MCU-Tg mice. Mice/group at the start of the study is indicated in  
1076 parentheses. Data analyzed by log-rank (Mantel-Cox) test. Left ventricular end-diastolic  
1077 dimension (LVEDD) (**C**), end-systolic dimension (LVESD) (**D**), and percent fractional shortening  
1078 (%FS) (**E**) over 14-days of Iso infusion. Data analyzed by 2-way ANOVA with Dunnett's post-  
1079 hoc test. \* $p < 0.05$ , \*\* $p < 0.01$ , \*\*\*\* $p < 0.0001$  vs. MCM; # $p < 0.05$ , ## $p < 0.01$ , ### $p < 0.001$  vs. day 0.  
1080 ( $n = 12-13$  MCM, 10-13 *Mcu*-cKO, 10-12 MCU-Tg mice). Heart weight-to-tibia length (HW/TL)  
1081 ratio (**F**) (Sham:  $n = 5$  MCM, 7 *Mcu*-cKO, 5 MCU-Tg mice; Iso:  $n = 12$  MCM, 10 *Mcu*-cKO, 10  
1082 MCU-Tg mice); cardiomyocyte cross sectional area (CSA) (**G**) (Sham:  $n = 4$  MCM, 5 *Mcu*-cKO, 4  
1083 MCU-Tg mice; Iso:  $n = 4$  mice/genotype); and lung edema (**H**) (Sham:  $n = 4$  MCM, 6 *Mcu*-cKO, 4  
1084 MCU-Tg mice; Iso:  $n = 12$  MCM, 10 *Mcu*-cKO, 10 MCU-Tg mice) at 14-day endpoint. Data  
1085 analyzed by 2-way ANOVA with Sidak's post-hoc test. \* $p < 0.05$ , \*\* $p < 0.01$  vs. MCM; # $p < 0.05$ ,  
1086 ## $p < 0.01$ , #### $p < 0.0001$  vs. Sham.

1087  
1088 **Figure 5: Increased  $mCa^{2+}$  uptake increases  $Ca^{2+}$ -induced reactive oxygen species (ROS)**  
1089 **production and cell death in adult cardiomyocytes. A)** ROS generation as indicated by  
1090 dihydroethidium (DHE) fluorescence in isolated adult  $\alpha$ MHC-MCM (MCM) and  $\alpha$ MHC-MCM x  
1091 flox-stop-MCU (MCU-Tg) mouse cardiomyocytes incubated with the  $Ca^{2+}$  ionophore, ionomycin.  
1092 Data analyzed by unpaired, two-tailed *t*-test. ( $n = 4$  mice/genotype). **B)** ROS generation in  
1093 isolated adult mouse cardiomyocytes incubated with the respiratory complex III inhibitor,  
1094 antimycin A. Data analyzed by unpaired, two-tailed *t*-test. \* $p < 0.05$ . ( $n = 4$  mice/genotype). **C)** Cell

1095 death as indicated by increased propidium iodide (PI) fluorescence in isolated adult mouse  
1096 cardiomyocytes incubated with increasing doses of ionomycin. Best-fit  $EC_{50}$  values compared  
1097 by extra-sum-of squares F-test.  $**p < 0.01$  vs. MCM. ( $n=10$  MCM mice, 12 MCU-Tg mice). **D**) Cell  
1098 death as indicated by an increase in PI fluorescence in isolated adult mouse cardiomyocytes  
1099 incubated with isoproterenol. Data analyzed by unpaired, two-tailed  $t$ -test. ( $n=10$  MCM mice, 12  
1100 MCU-Tg mice).

1101

1102 **Figure 6: Genetic inhibition of the mPTP (*Ppif*<sup>-/-</sup>) does not prevent contractile dysfunction,**  
1103 **remodeling, or cardiomyocyte death in MCU-Tg hearts during chronic isoproterenol**  
1104 **infusion. A)** Western blots confirming tamoxifen-inducible overexpression of MCU in MCU-Tg  
1105 hearts and constitutive deletion of cyclophilin D (CypD) in *Ppif*<sup>-/-</sup> hearts. Expression of mtCU  
1106 components EMRE and MICU1, and pyruvate dehydrogenase (PDH) phosphorylation and  
1107 subunit expression were also examined. Hearts were collected after 14-days of isoproterenol  
1108 (Iso) infusion. ATP5A is shown as a mitochondrial loading control. Corresponding full-length  
1109 blots are shown in Supplemental Fig. S5. Left ventricular end-diastolic dimension (LVEDD) (**B**),  
1110 end-systolic dimension (LVESD) (**C**), and percent fractional shortening (%FS) (**D**) over 14 days  
1111 of Iso infusion. Data analyzed by 2-way ANOVA with Sidak's post-hoc test.  $*p < 0.05$ ,  $**p < 0.01$ ,  
1112  $***p < 0.001$ ,  $****p < 0.0001$  between genotypes;  $\#p < 0.05$ ,  $\##p < 0.01$ ,  $\###p < 0.001$ ,  $\####p < 0.0001$  vs.  
1113 day 0. ( $n=8$  MCM; 4-8 MCU-Tg; 8 MCM x *Ppif*<sup>-/-</sup>; and 6-8 MCU-Tg x *Ppif*<sup>-/-</sup> mice). Heart weight-  
1114 to-tibia length (HW/TL) ratio (**E**) and lung edema (**F**) at 14-day endpoint. Data analyzed by 2-  
1115 way ANOVA with Sidak's post-hoc test.  $*p < 0.05$  between genotypes;  $\#p < 0.05$ ,  $\###p < 0.001$ ,  
1116  $####p < 0.0001$  vs. Sham. (Sham:  $n=6$  mice/genotype; Iso:  $n=8$  MCM, 4 MCU-Tg, 8 MCM x *Ppif*<sup>-/-</sup>,  
1117 and 6 MCU-Tg x *Ppif*<sup>-/-</sup> mice). **G**) Wheat germ agglutinin (green) and Evans blue dye (EBD)  
1118 (red) staining in the myocardium at 14-day endpoint. Scale bars = 200  $\mu$ m. **H**) Percentage of  
1119 cardiomyocytes stained with EBD as an index of membrane compromise and necrosis. Data

1120 analyzed by 2-way ANOVA with Sidak's post-hoc test. \* $p < 0.05$ , \*\* $p < 0.01$ , \*\*\*\* $p < 0.0001$  between  
1121 genotypes; ##### $p < 0.0001$  vs. Sham. (Sham:  $n=6$  mice/genotype; Iso:  $n=8$  MCM, 4 MCU-Tg, 8  
1122 MCM x *Ppif*<sup>-/-</sup>, and 6 MCU-Tg x *Ppif*<sup>-/-</sup> mice).

1123

1124

1125

1126

1127

1128

1129

1130

1131

1132

1133

1134

1135

1136

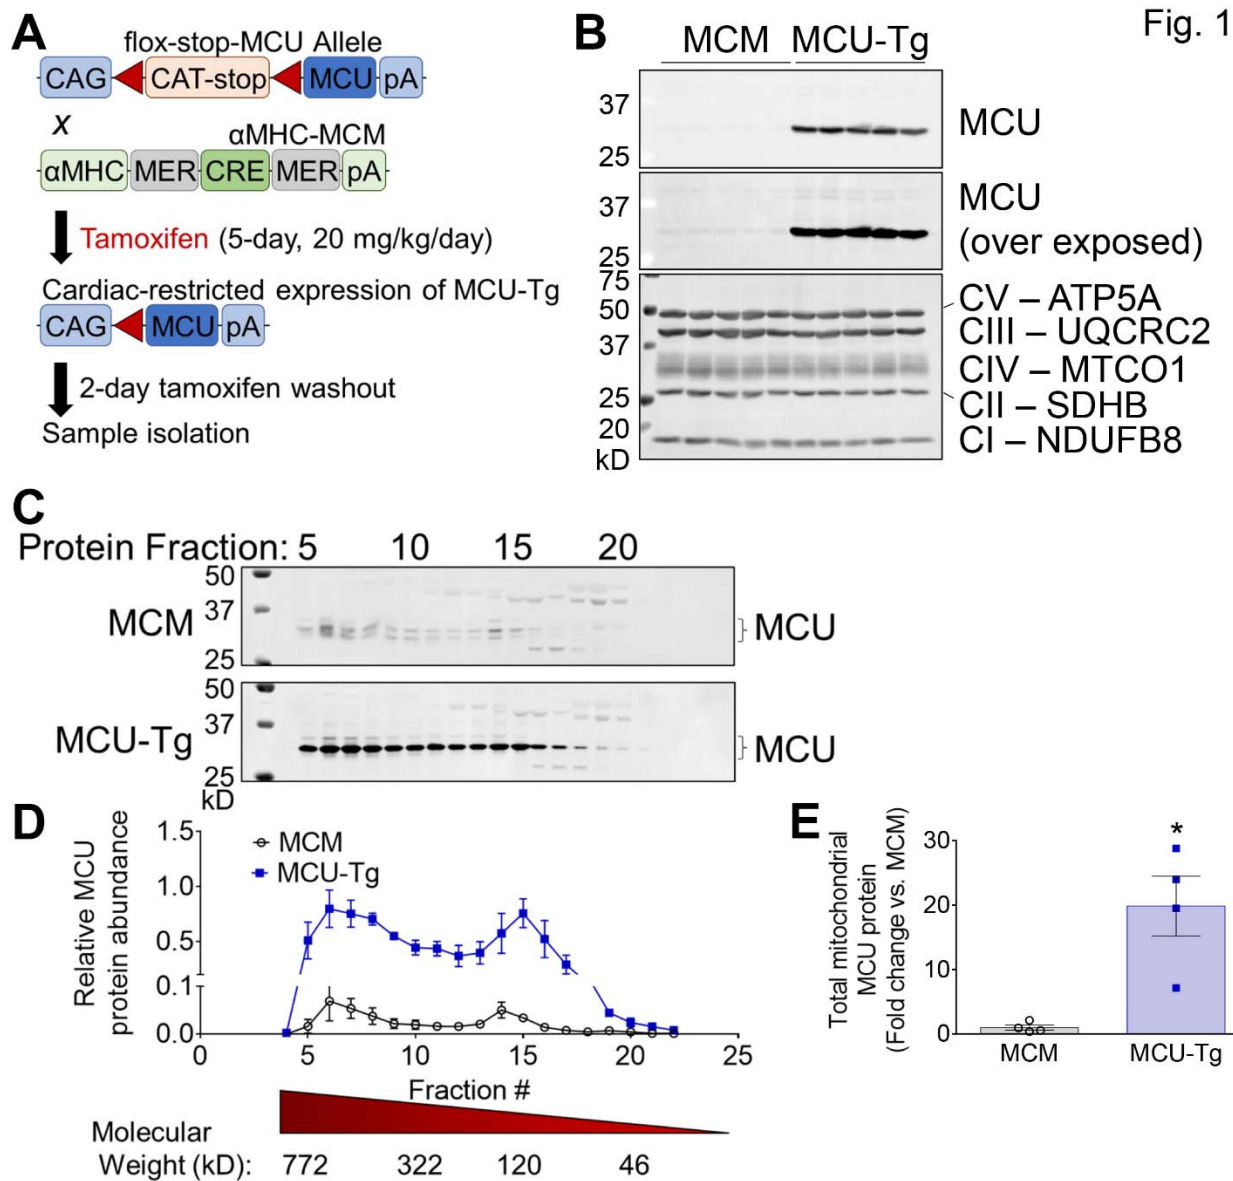

1137

1138

1139

1140

1141

1142

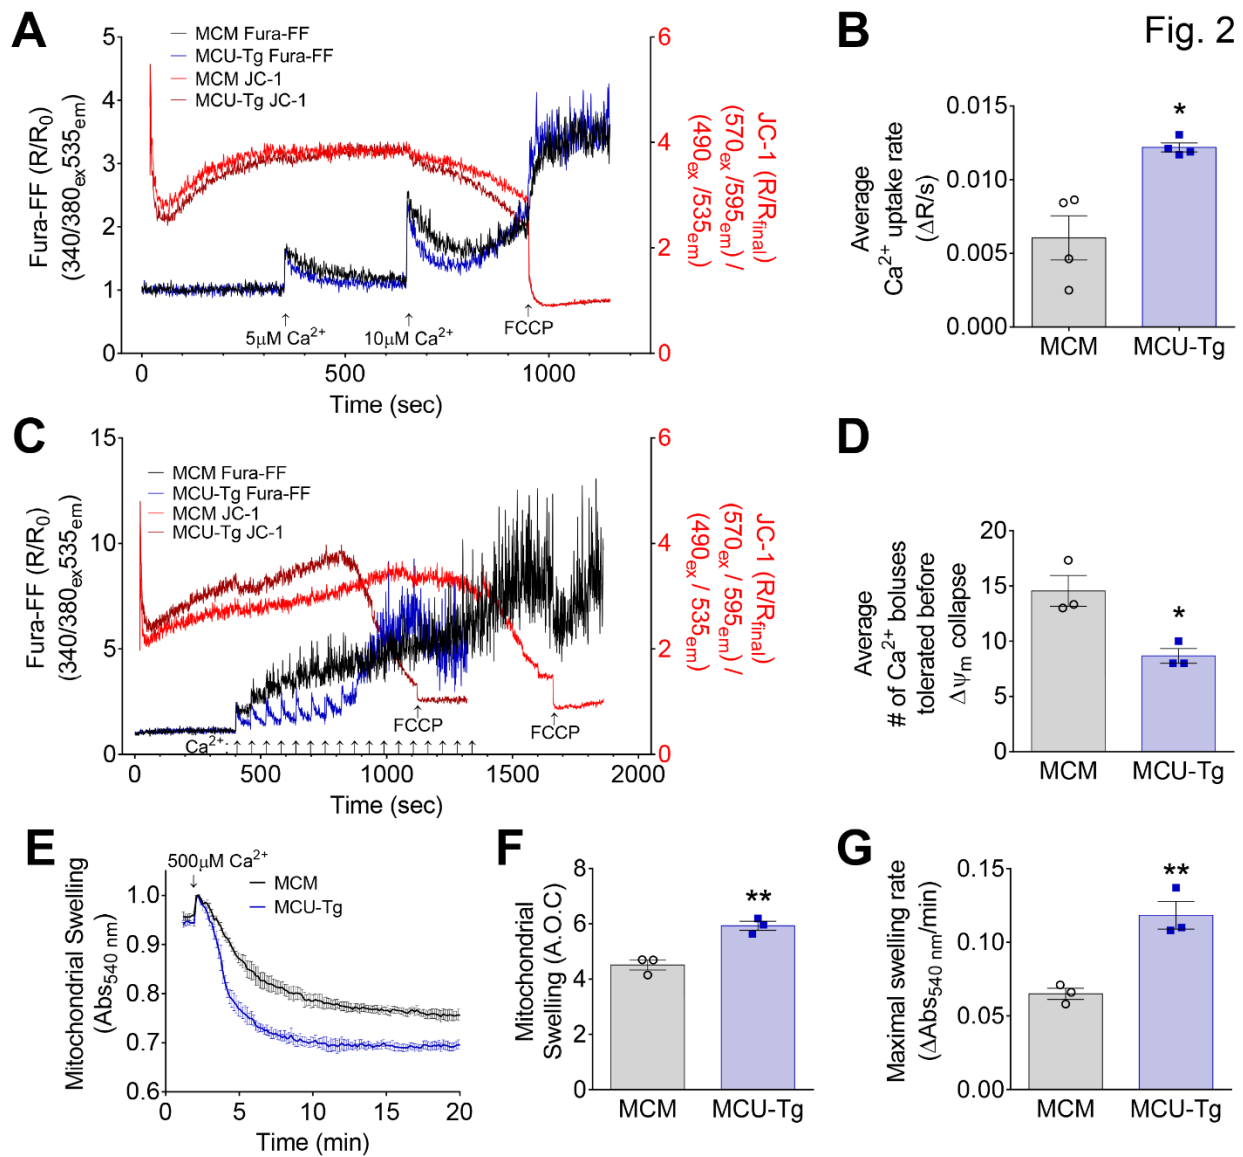

1143

1144

1145

1146

1147

1148

1149

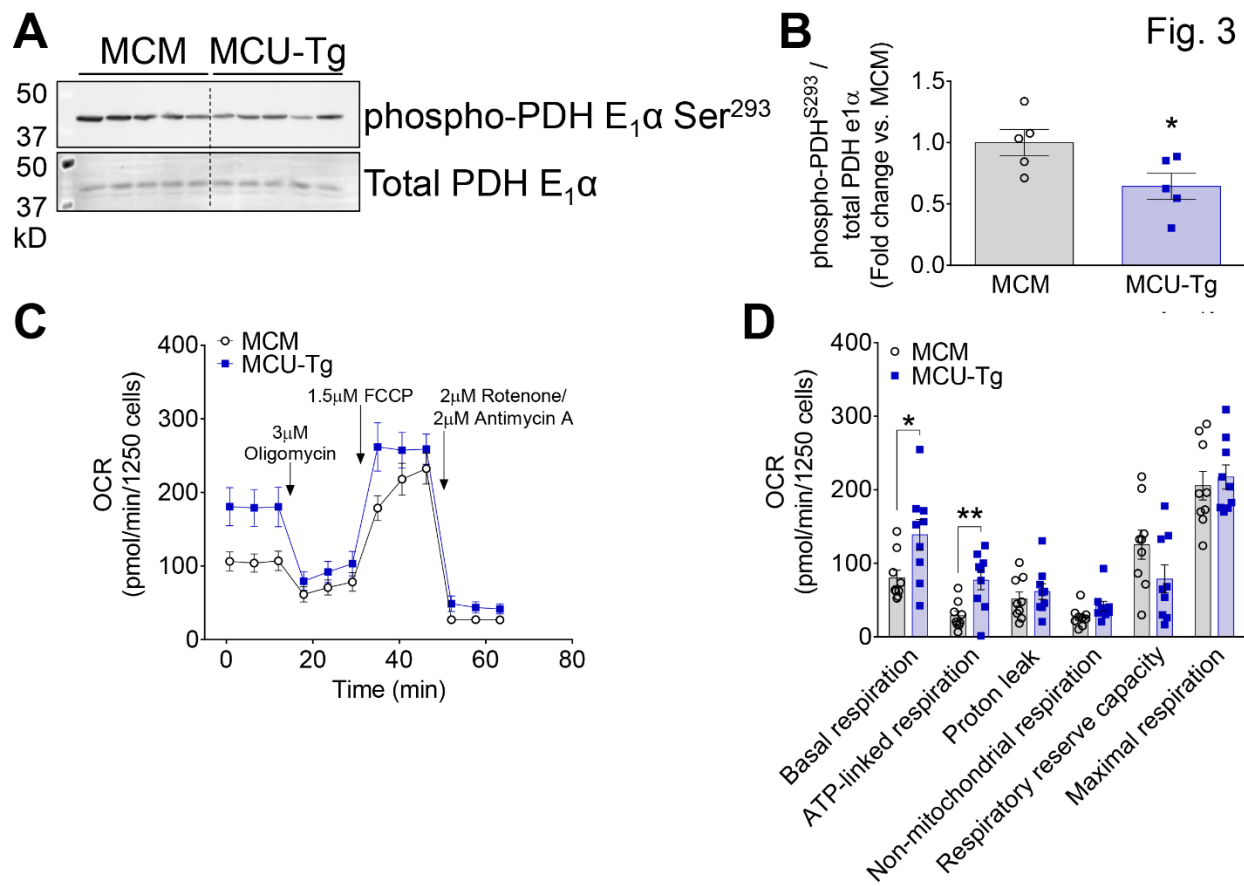

1150

1151

1152

1153

1154

1155

1156

1157

1158

1159



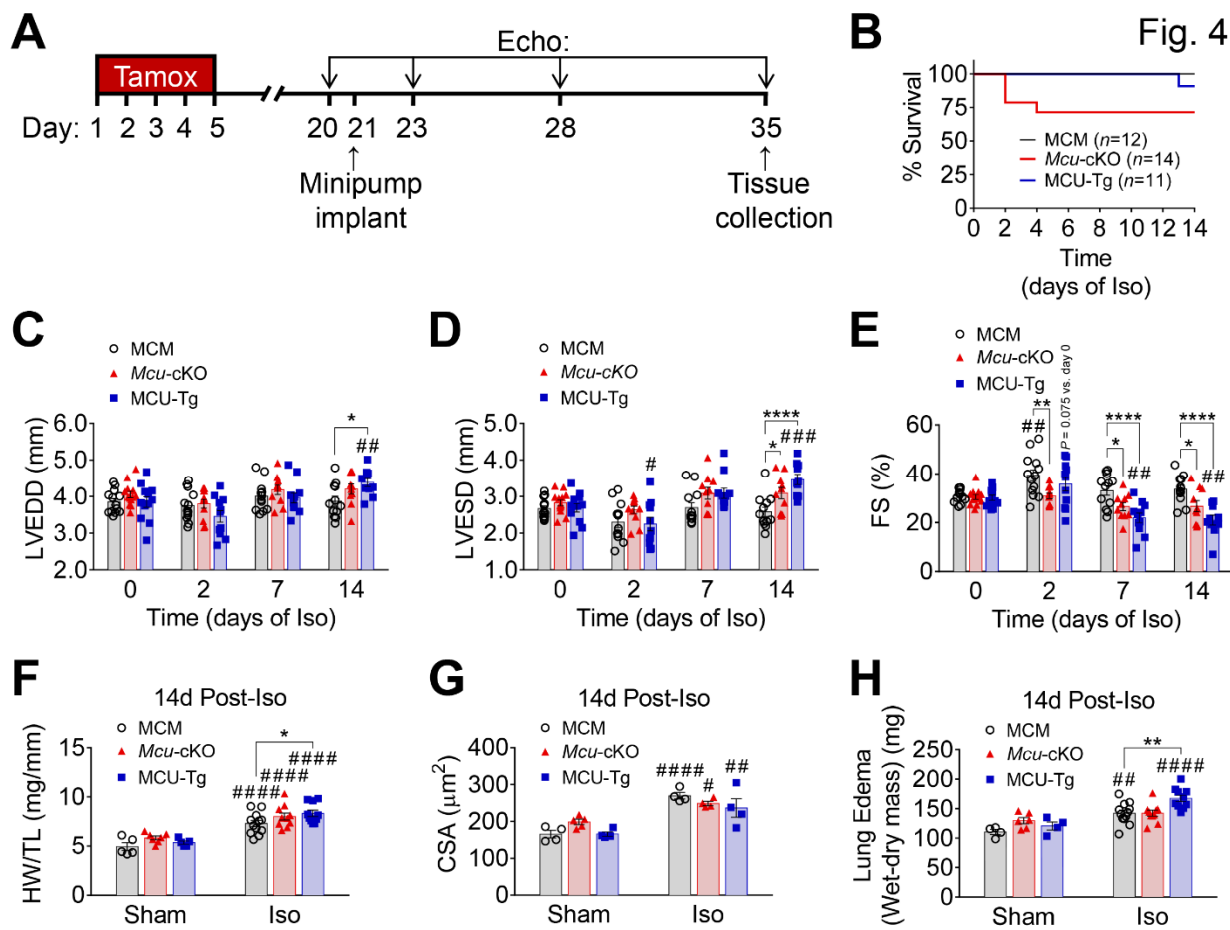

1160

1161

1162

1163

1164

1165

1166

1167

1168

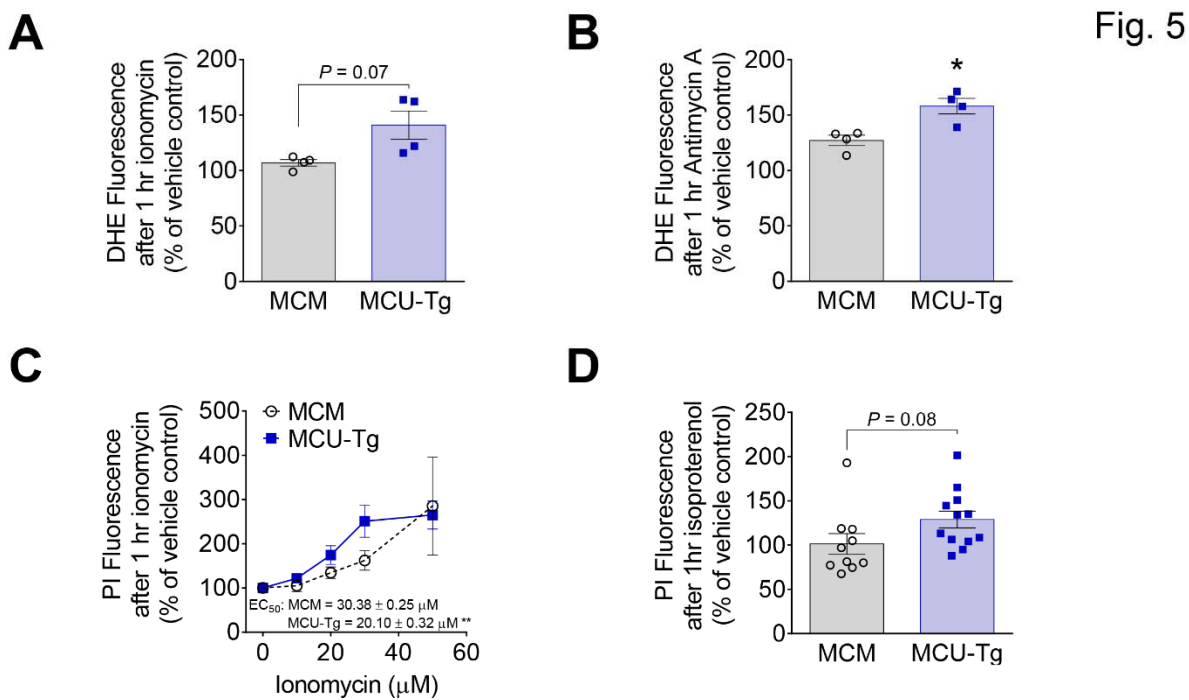

Fig. 5

1169

1170

1171

1172

1173

1174

1175

1176

1177

1178

1179

1180

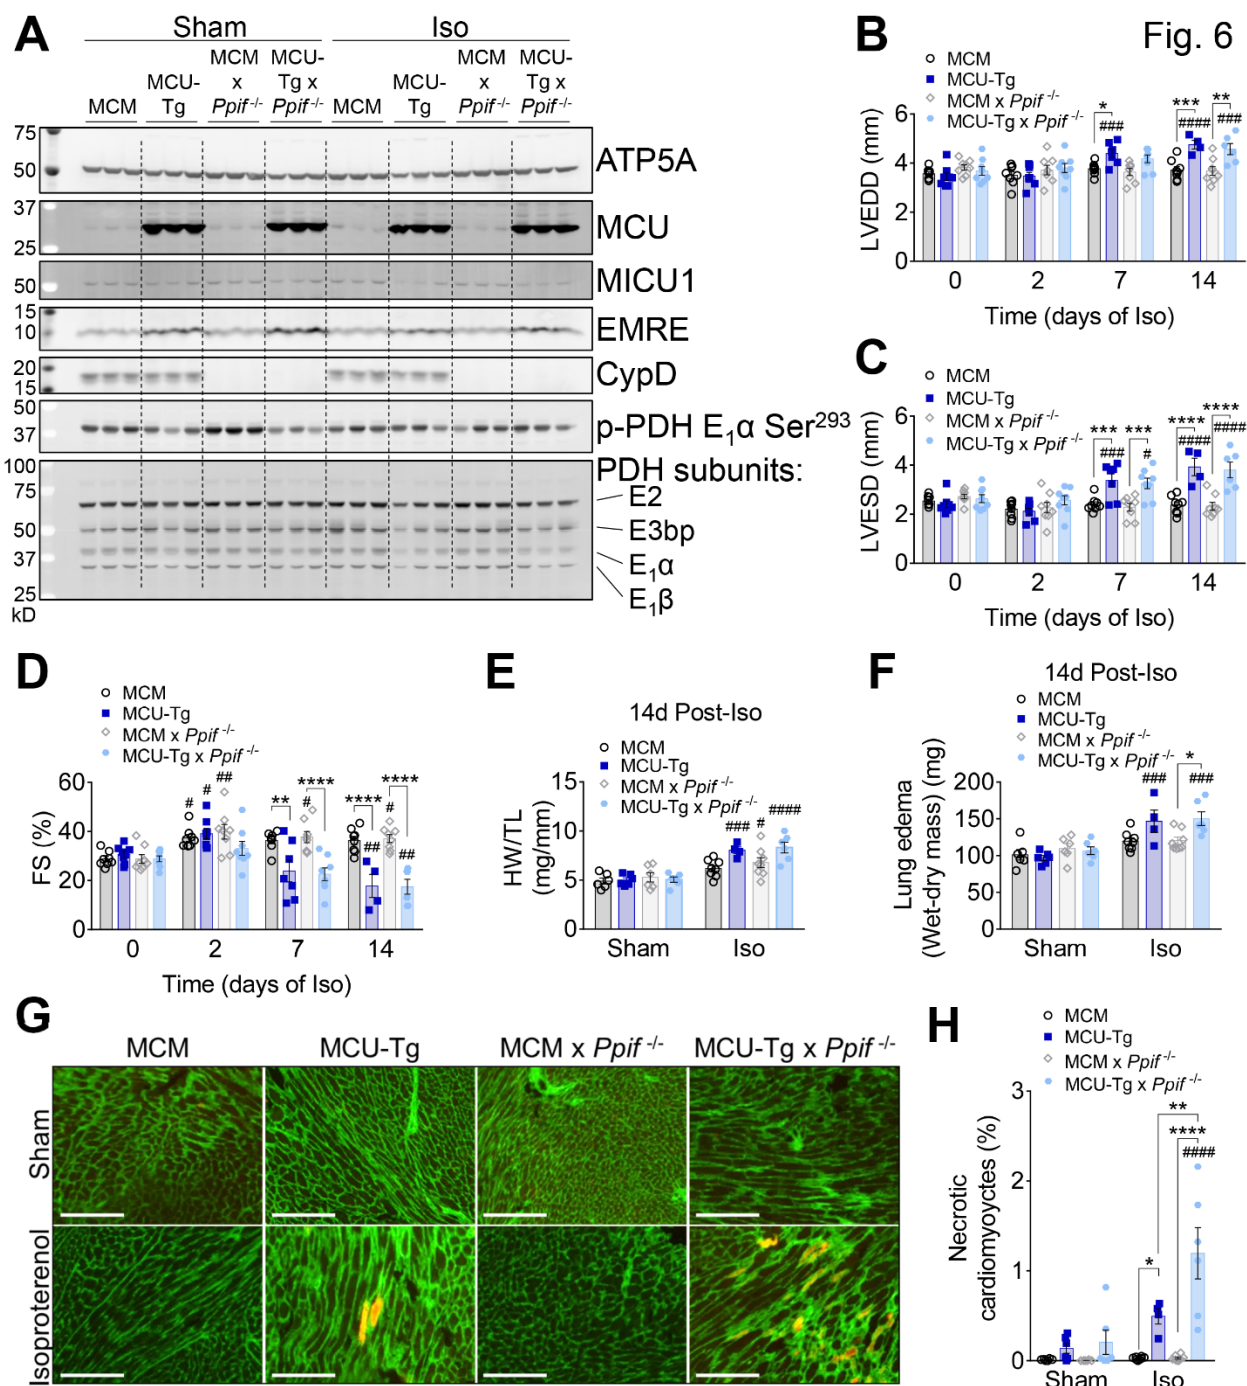

1181
